# Supplementary material
Source: Research Square preprint supplement (doi:10.21203/rs.3.rs-9647180/v1)
Supplement: Supplementary file 1 [file 560f3f4556d2f05dfce02914.docx]

Supplementary Table 1. Mean, standard error, standard deviation and coefficient of variation of advanced line (**F4 generation**) for plant height (cm) and spike length (cm)

| Serial Number | Line Number | Plant height (cm) | | | | | Spike Length (cm) | | | | |
| --- | --- | --- | --- | --- | --- | --- | --- | --- | --- | --- | --- |
| Min | Max | Mean ± SE | Std. Dev. | CV | Min | Max | Mean ± SE | Std. Dev. | CV |
|  | P3-2-2 | 57 | 111 | 87.00±5.37 | 16.97 | 0.20 | 18 | 21 | 19.20±0.51 | 1.15 | 0.06 |
|  | P3-2-3 | 71 | 97 | 84.00±3.04 | 9.60 | 0.11 | 11 | 14 | 11.90±0.26 | 0.81 | 0.07 |
|  | P3-2-5 | 61 | 106 | 80.90±4.88 | 15.42 | 0.19 | 10 | 13 | 11.75±0.34 | 1.09 | 0.09 |
|  | P3-2-6 | 73 | 105 | 86.10±4.10 | 12.97 | 0.15 | 18 | 19 | 18.70±0.20 | 0.45 | 0.02 |
|  | P3-2-9 | 58 | 92 | 82.00±3.36 | 10.62 | 0.13 | 8 | 13 | 10.80±0.50 | 1.57 | 0.15 |
|  | P3-2-10 | 63 | 110 | 89.00±4.78 | 15.11 | 0.17 | 9.5 | 14 | 11.35±0.47 | 1.47 | 0.13 |
|  | P3-3-1 | 69 | 100 | 89.11±3.79 | 11.98 | 0.13 | 10 | 14.5 | 12.30±0.80 | 1.79 | 0.15 |
|  | P3-3-2 | 76 | 113 | 93.50±4.61 | 14.59 | 0.16 | 10.5 | 14 | 12.85±0.33 | 1.03 | 0.08 |
|  | P3-3-3 | 71 | 116 | 89.30±5.94 | 18.80 | 0.21 | 16 | 20 | 17.80±0.73 | 1.64 | 0.09 |
|  | P3-3-4 | 58 | 106 | 84.20±5.23 | 16.55 | 0.20 | 11.5 | 14 | 12.90±0.23 | 0.74 | 0.06 |
|  | P3-3-8 | 66 | 102 | 79.67±3.27 | 10.34 | 0.13 | 7.5 | 13 | 9.95±0.59 | 1.88 | 0.19 |
|  | P3-3-10 | 71 | 111 | 88.90±3.89 | 12.31 | 0.14 | 10 | 15 | 12.40±0.50 | 1.60 | 0.13 |
|  | P3-4-2 | 66 | 118 | 87.60±5.78 | 18.28 | 0.21 | 9 | 12.5 | 11.30±0.36 | 1.14 | 0.10 |
|  | P3-4-3 | 50 | 93 | 73.90±5.03 | 15.89 | 0.22 | 9 | 13 | 11.05±0.44 | 1.38 | 0.13 |
|  | P3-4-4 | 53 | 91 | 76.10±4.82 | 15.25 | 0.20 | 10 | 14 | 12.10±0.38 | 1.20 | 0.10 |
|  | P3-4-5 | 54 | 109 | 78.50±6.65 | 21.03 | 0.27 | 10 | 13 | 11.10±0.29 | 0.91 | 0.08 |
|  | P3-4-6 | 50 | 106 | 77.30±6.35 | 20.07 | 0.26 | 14 | 16 | 15.50±0.39 | 0.87 | 0.06 |
|  | P3-4-10 | 44 | 104 | 80.40±5.97 | 18.89 | 0.23 | 10 | 13 | 11.15±0.34 | 1.08 | 0.10 |
|  | P3-5-1 | 62 | 100 | 80.10±4.72 | 14.93 | 0.19 | 7 | 10 | 9.00±0.33 | 1.05 | 0.12 |
|  | P3-5-2 | 57 | 103 | 82.40±5.16 | 16.31 | 0.20 | 15 | 19 | 16.80±0.64 | 1.44 | 0.09 |
|  | P3-5-3 | 66 | 100 | 85.40±3.49 | 11.04 | 0.13 | 8.5 | 13 | 10.70±0.50 | 1.57 | 0.15 |
|  | P3-5-4 | 60 | 128 | 83.90±7.15 | 22.61 | 0.27 | 7 | 12 | 9.95±0.49 | 1.55 | 0.16 |
|  | P3-5-5 | 65 | 119 | 83.50±7.14 | 22.59 | 0.27 | 8 | 12 | 10.15±0.35 | 1.11 | 0.11 |
|  | P3-5-6 | 80 | 95 | 89.00±2.51 | 7.94 | 0.09 | 9.5 | 11 | 10.17±0.24 | 0.76 | 0.08 |
|  | P3-11-1 | 58 | 105 | 80.80±5.15 | 16.29 | 0.20 | * | * | * | * | * |
|  | P3-11-2 | 58 | 58 | 58.00±0 | * | * | * | * | * | * | * |
|  | P3-11-3 | 66 | 108 | 83.30±4.73 | 14.97 | 0.18 | 15.5 | 17.5 | 16.40±0.37 | 0.82 | 0.05 |
|  | P3-11-4 | 35 | 44 | 39.50±4.50 | 6.36 | 0.16 | * | * | * | * | * |
|  | P3-11-5 | 53 | 109 | 78.20±6.31 | 19.96 | 0.26 | * | * | * | * | * |
|  | P3-11-6 | 58 | 94 | 73.40±3.80 | 12.01 | 0.16 | * | * | * | * | * |
|  | P3-11-7 | 49 | 90 | 77.63±4.14 | 13.09 | 0.17 | 10.5 | 13 | 12.36±0.34 | 0.90 | 0.07 |
|  | P3-11-8 | 45 | 91 | 68.10±4.56 | 14.42 | 0.21 | * | * | * | * | * |
|  | P3-11-9 | 49 | 93 | 69.70±5.52 | 17.46 | 0.25 | 10.5 | 12.5 | 11.45±0.22 | 0.69 | 0.06 |
|  | P3-17-1 | 57 | 105 | 79.40±6.86 | 21.69 | 0.27 | 8 | 11 | 9.60±0.27 | 0.84 | 0.09 |
|  | P3-17-2 | 53 | 94 | 75.10±4.52 | 14.30 | 0.19 | 8.5 | 13 | 9.95±0.46 | 1.44 | 0.14 |
|  | P3-17-3 | 51 | 90 | 71.50±4.77 | 15.08 | 0.21 | 9.5 | 12 | 10.90±0.27 | 0.84 | 0.08 |
|  | P3-17-4 | 62 | 103 | 81.30±4.28 | 13.53 | 0.17 | 9 | 13 | 10.95±0.39 | 1.23 | 0.11 |
|  | P3-17-5 | 75 | 92 | 86.00±3.76 | 7.53 | 0.09 | 11.5 | 13 | 12.33±0.44 | 0.76 | 0.06 |
|  | P3-17-6 | 66 | 91 | 78.57±3.81 | 10.08 | 0.13 | 9 | 11 | 10.20±0.34 | 0.76 | 0.07 |
|  | P3-17-7 | 45 | 97 | 73.10±5.13 | 16.21 | 0.22 | 8 | 11.5 | 9.40±0.37 | 1.17 | 0.12 |
|  | P3-17-8 | 50 | 101 | 76.80±5.96 | 18.84 | 0.25 | 9.5 | 12 | 11.05±0.28 | 0.90 | 0.08 |
|  | P3-17-9 | 61 | 87 | 76.00±3.55 | 10.04 | 0.13 | 8 | 12 | 10.25±0.85 | 1.71 | 0.17 |
|  | P3-17-10 | 51 | 96 | 77.90±4.31 | 13.62 | 0.17 | 8 | 11.5 | 9.60±0.43 | 1.35 | 0.14 |
|  | P3-18-1 | 43 | 96 | 74.30±5.51 | 17.42 | 0.23 | 8 | 11 | 9.20±0.35 | 1.11 | 0.12 |
|  | P3-18-2 | 74 | 93 | 81.40±3.05 | 9.64 | 0.12 | 8.5 | 11 | 9.95±0.25 | 0.80 | 0.08 |
|  | P3-18-3 | 61 | 97 | 80.30±3.50 | 11.07 | 0.14 | 14.5 | 15 | 14.80±0.12 | 0.27 | 0.02 |
|  | P3-18-4 | 62 | 98 | 77.40±4.23 | 13.38 | 0.17 | 8.5 | 11 | 9.75±0.28 | 0.89 | 0.09 |
|  | P3-18-5 | 57 | 98 | 76.70±4.56 | 14.43 | 0.19 | 7.5 | 10 | 9.00±0.26 | 0.82 | 0.09 |
|  | P3-18-6 | 54 | 87 | 72.80±3.66 | 11.58 | 0.16 | 8 | 11 | 9.40±0.27 | 0.84 | 0.09 |
|  | P3-18-7 | 59 | 91 | 73.50±3.52 | 11.14 | 0.15 | 6 | 12 | 9.40±0.49 | 1.54 | 0.16 |
|  | P3-18-8 | 67 | 92 | 82.22±2.91 | 9.22 | 0.11 | 10 | 12 | 10.70±0.37 | 0.84 | 0.08 |
|  | P3-18-9 | 60 | 93 | 74.30±4.15 | 13.13 | 0.18 | 7 | 11 | 8.70±0.38 | 1.21 | 0.14 |
|  | P3-18-10 | 51 | 89 | 69.60±4.02 | 12.70 | 0.18 | 13 | 17 | 14.50±0.71 | 1.58 | 0.11 |
|  | P3-21-1 | 66 | 109 | 92.50±4.69 | 14.83 | 0.16 | 9 | 16 | 11.70±0.76 | 2.39 | 0.20 |
|  | P3-21-2 | 65 | 106 | 82.20±4.14 | 13.10 | 0.16 | 9 | 13 | 11.30±0.37 | 1.18 | 0.10 |
|  | P3-21-3 | 65 | 105 | 87.70±4.16 | 13.17 | 0.15 | 9 | 11 | 10.30±0.24 | 0.75 | 0.07 |
|  | P3-21-4 | 68 | 96 | 78.60±3.16 | 10.00 | 0.13 | 9 | 12 | 10.25±0.35 | 1.11 | 0.11 |
|  | P3-21-5 | 57 | 106 | 81.80±5.08 | 16.05 | 0.20 | 8.5 | 13 | 10.75±0.49 | 1.55 | 0.14 |
|  | P3-21-6 | 65 | 101 | 84.30±3.94 | 12.47 | 0.15 | 9 | 14 | 12.20±0.48 | 1.53 | 0.13 |
|  | P3-21-7 | 68 | 110 | 93.20±3.91 | 12.37 | 0.13 | 8 | 11.5 | 9.30±0.34 | 1.09 | 0.12 |
|  | P3-21-8 | 67 | 108 | 87.30±3.67 | 11.61 | 0.13 | 8 | 12 | 10.45±0.40 | 1.26 | 0.12 |
|  | P3-21-9 | 67 | 100 | 87.90±3.29 | 10.41 | 0.12 | 9 | 12 | 10.35±0.29 | 0.91 | 0.09 |
|  | P3-21-10 | 65 | 105 | 86.10±3.95 | 12.48 | 0.14 | 15 | 16.5 | 15.80±0.25 | 0.57 | 0.04 |
|  | P3-24-1 | 56 | 104 | 77.60±5.19 | 16.40 | 0.21 | 6 | 10 | 9.05±0.38 | 1.19 | 0.13 |
|  | P3-24-2 | 61 | 94 | 76.80±3.48 | 10.99 | 0.14 | 8 | 11.5 | 9.70±0.38 | 1.21 | 0.12 |
|  | P3-24-3 | 60 | 109 | 86.30±5.12 | 16.19 | 0.19 | 9 | 13 | 10.55±0.35 | 1.12 | 0.11 |
|  | P3-24-4 | 62 | 111 | 80.40±5.08 | 16.08 | 0.20 | 8 | 13 | 10.25±0.48 | 1.51 | 0.15 |
|  | P3-24-5 | 53 | 106 | 76.10±5.26 | 16.63 | 0.22 | 8.5 | 11 | 9.60±0.22 | 0.70 | 0.07 |
|  | P3-24-6 | 65 | 106 | 85.00±4.91 | 15.51 | 0.18 | 8.5 | 13.5 | 11.00±0.42 | 1.33 | 0.12 |
|  | P3-24-7 | 58 | 112 | 83.00±5.36 | 16.94 | 0.20 | 9 | 12 | 10.25±0.32 | 1.01 | 0.10 |
|  | P3-24-8 | 55 | 91 | 72.90±4.33 | 13.70 | 0.19 | 7.5 | 11 | 9.25±0.37 | 1.16 | 0.13 |
|  | P3-24-9 | 74 | 118 | 95.30±4.57 | 14.46 | 0.15 | 8 | 14 | 10.55±0.56 | 1.79 | 0.17 |
|  | P3-24-10 | 49 | 76 | 66.60±3.02 | 9.55 | 0.14 | 15 | 18 | 16.50±0.63 | 1.41 | 0.09 |
|  | P3-28-1 | 71 | 90 | 80.20±2.40 | 7.60 | 0.09 | 9 | 12 | 10.90±0.35 | 1.10 | 0.10 |
|  | P3-28-3 | 65 | 88 | 77.70±2.31 | 7.30 | 0.09 | 15 | 16.5 | 15.90±0.29 | 0.65 | 0.04 |
|  | P3-28-4 | 71 | 101 | 85.60±2.63 | 8.33 | 0.10 | 10 | 13.5 | 11.40±0.37 | 1.17 | 0.10 |
|  | P3-28-5 | 61 | 96 | 83.00±3.44 | 10.88 | 0.13 | 10 | 13 | 11.60±0.58 | 1.29 | 0.11 |
|  | P3-28-6 | 64 | 90 | 76.60±2.69 | 8.51 | 0.11 | 10 | 16.5 | 11.30±0.60 | 1.89 | 0.17 |
|  | P3-28-7 | 71 | 84 | 75.00±4.51 | 7.81 | 0.10 | 12 | 13 | 12.50±0.50 | 0.71 | 0.06 |
|  | P3-28-8 | 64 | 89 | 78.90±2.62 | 8.29 | 0.11 | 10 | 14 | 11.35±0.37 | 1.16 | 0.10 |
|  | P3-28-9 | 71 | 93 | 81.70±2.26 | 7.15 | 0.09 | 8 | 12 | 10.30±0.51 | 1.60 | 0.16 |
|  | P3-28-10 | 71 | 98 | 83.83±4.13 | 10.11 | 0.12 | 7 | 13.5 | 8.80±1.35 | 3.01 | 0.34 |
|  | P3-29-1 | 74 | 112 | 89.10±3.75 | 11.86 | 0.13 | 9 | 12.5 | 11.00±0.38 | 1.20 | 0.11 |
|  | P3-29-2 | 59 | 110 | 89.50±4.81 | 15.21 | 0.17 | 16 | 18.5 | 16.90±0.46 | 1.02 | 0.06 |
|  | P3-29-4 | 76 | 115 | 95.60±3.80 | 12.00 | 0.13 | 17 | 19 | 18.00±0.35 | 0.79 | 0.04 |
|  | P3-29-5 | 62 | 103 | 84.40±3.84 | 12.13 | 0.14 | 7.5 | 12 | 10.00±0.39 | 1.25 | 0.12 |
|  | P3-29-6 | 73 | 106 | 91.50±3.43 | 10.84 | 0.12 | 10 | 13 | 11.68±0.39 | 1.10 | 0.09 |
|  | P3-29-7 | 70 | 110 | 90.10±4.31 | 13.62 | 0.15 | 9.5 | 12 | 10.70±0.25 | 0.79 | 0.07 |
|  | P3-29-8 | 78 | 111 | 91.90±3.09 | 9.77 | 0.11 | 6.5 | 13 | 10.95±0.56 | 1.77 | 0.16 |
|  | P3-29-9 | 70 | 112 | 90.90±4.66 | 14.75 | 0.16 | 10 | 12.5 | 11.15±0.29 | 0.91 | 0.08 |
|  | P3-29-10 | 63 | 104 | 84.50±4.21 | 13.33 | 0.16 | 15 | 18 | 16.40±0.58 | 1.29 | 0.08 |
|  | P3-30-1 | 74 | 99 | 86.43±2.76 | 8.73 | 0.10 | 10 | 13 | 11.36±0.50 | 1.31 | 0.12 |
|  | P3-30-3 | 65 | 104 | 85.37±4.42 | 13.98 | 0.16 | 10 | 12.5 | 11.43±0.35 | 0.93 | 0.08 |
|  | P3-30-4 | 74 | 104 | 89.80±3.01 | 9.53 | 0.11 | 10 | 13 | 11.60±0.37 | 1.17 | 0.10 |
|  | P3-30-5 | 71 | 100 | 87.70±3.17 | 10.02 | 0.11 | 8 | 14 | 12.05±0.71 | 2.24 | 0.19 |
|  | P3-30-6 | 49 | 98 | 80.75±11.12 | 22.23 | 0.28 | 8 | 12 | 9.67±1.20 | 2.08 | 0.22 |
|  | P3-30-7 | 74 | 108 | 92.20±3.56 | 11.27 | 0.12 | 7.5 | 12 | 10.05±0.51 | 1.62 | 0.16 |
|  | P3-30-8 | 67 | 103 | 83.25±4.51 | 12.75 | 0.15 | 9 | 12 | 10.50±0.32 | 1.00 | 0.10 |
|  | P3-32-1 | 81 | 129 | 108.00±6.26 | 19.78 | 0.18 | 10 | 11.5 | 10.85±0.22 | 0.71 | 0.07 |
|  | P3-32-2 | 81 | 113 | 100.33±9.82 | 17.01 | 0.17 | 2 | 12 | 8.25±2.17 | 4.35 | 0.53 |
|  | P3-32-3 | 60 | 123 | 98.75±6.66 | 21.05 | 0.21 | 8 | 12.5 | 12.50±0.47 | 1.48 | 0.12 |
|  | P3-32-4 | 79 | 113 | 98.60±3.12 | 9.86 | 0.10 | 7.5 | 12 | 9.95±0.46 | 1.44 | 0.14 |
|  | P3-32-5 | 68 | 94 | 80.75±3.01 | 9.51 | 0.12 | 8 | 12 | 10.10±0.40 | 1.26 | 0.13 |
|  | P3-32-6 | 69 | 93 | 86.50±4.39 | 10.75 | 0.12 | 9.5 | 12 | 11.00±0.45 | 1.00 | 0.09 |
|  | P3-32-7 | 71 | 125 | 99.10±6.21 | 19.65 | 0.20 | 8.5 | 12 | 10.55±0.38 | 1.19 | 0.11 |
|  | P3-32-8 | 67 | 118 | 93.63±5.70 | 16.12 | 0.17 | 10 | 13 | 12.15±0.37 | 1.16 | 0.10 |
|  | P3-73-4 | 68 | 85 | 79.00±3.76 | 7.53 | 0.10 | 8.5 | 11 | 10.17±0.83 | 1.44 | 0.14 |
|  | P3-73-5 | 57 | 96 | 80.20±3.71 | 11.75 | 0.15 | 9.5 | 12.5 | 10.85±0.43 | 1.38 | 0.13 |
|  | P3-73-6 | 48 | 92 | 71.14±6.05 | 16.00 | 0.22 | 8.5 | 11.5 | 10.05±0.32 | 1.01 | 0.10 |
|  | P3-73-7 | 57 | 86 | 72.29±4.30 | 11.37 | 0.16 | * | * | * | * | * |
|  | P3-73-8 | 67 | 93 | 80.70±2.74 | 8.65 | 0.11 | 6.5 | 9.5 | 8.30±0.35 | 1.11 | 0.13 |
|  | P3-73-10 | 73 | 81 | 78.00±2.52 | 4.36 | 0.06 | 9 | 12 | 10.50±0.87 | 1.50 | 0.14 |
|  | P3-89-2 | 76 | 95 | 88.20±2.25 | 7.13 | 0.08 | 7 | 12.5 | 9.95±0.47 | 1.48 | 0.15 |
|  | P3-89-4 | 74 | 95 | 84.40±3.50 | 7.83 | 0.09 | 5.5 | 10 | 7.33±0.79 | 1.94 | 0.26 |
|  | P3-89-7 | 70 | 91 | 81.66±3.45 | 8.45 | 0.10 | 7 | 8.5 | 7.75±0.75 | 1.06 | 0.14 |
|  | P3-89-9 | 79 | 90 | 85.67±3.38 | 5.86 | 0.07 | 6 | 11 | 8.25±1.31 | 2.63 | 0.32 |
|  | P3-89-10 | 62 | 99 | 79.70±4.57 | 14.44 | 0.18 | 5 | 11.5 | 8.20±0.67 | 2.11 | 0.26 |
|  | P4-4-3 | 57 | 87 | 74.60±5.34 | 11.95 | 0.16 | 8 | 15 | 11.67±1.30 | 3.19 | 0.27 |
|  | P4-4-4 | 62 | 97 | 77.50±5.12 | 12.53 | 0.16 | 7 | 14 | 10.70±0.71 | 2.25 | 0.21 |
|  | P4-4-6 | 63 | 94 | 77.80±3.34 | 10.56 | 0.14 | 9 | 15 | 11.55±0.58 | 1.83 | 0.16 |
|  | P4-4-10 | 70 | 91 | 79.90±3.09 | 9.76 | 0.12 | 8 | 15 | 12.10±0.77 | 2.44 | 0.20 |
|  | P4-9-1 | 64 | 110 | 88.10±4.83 | 15.27 | 0.17 | 7.5 | 11 | 9.50±0.34 | 1.08 | 0.11 |
|  | P4-9-2 | 60 | 109 | 85.60±6.71 | 21.22 | 0.25 | 4 | 10 | 8.25±0.93 | 2.27 | 0.28 |
|  | P4-9-3 | 60 | 115 | 82.60±6.85 | 21.65 | 0.26 | 8.5 | 13 | 9.90±0.43 | 1.37 | 0.14 |
|  | P4-9-4 | 58 | 97 | 78.83±6.07 | 14.86 | 0.19 | 6.5 | 9 | 7.85±0.32 | 0.85 | 0.11 |
|  | P4-9-5 | 68 | 114 | 90.80±4.19 | 13.24 | 0.15 | 7.5 | 10.5 | 9.00±0.31 | 0.97 | 0.11 |
|  | P4-9-6 | 58 | 117 | 88.40±5.73 | 18.11 | 0.20 | 8.5 | 11 | 9.35±0.24 | 0.75 | 0.08 |
|  | P4-9-7 | 58 | 115 | 86.30±6.71 | 21.21 | 0.25 | 8 | 12 | 9.80±0.43 | 1.36 | 0.14 |
|  | P4-9-8 | 51 | 117 | 90.60±6.40 | 20.25 | 0.22 | 9.5 | 10 | 9.83±0.17 | 0.29 | 0.03 |
|  | P4-9-9 | 48 | 103 | 79.10±5.43 | 17.17 | 0.22 | 7 | 11 | 8.75±0.32 | 1.01 | 0.12 |
|  | P4-9-10 | 56 | 112 | 88.60±5.71 | 18.07 | 0.20 | 8 | 9.5 | 8.63±0.38 | 0.75 | 0.09 |
|  | P4-12-1 | 36 | 73 | 57.80±4.08 | 12.90 | 0.22 | 6.5 | 12 | 8.85±0.46 | 1.45 | 0.16 |
|  | P4-12-2 | 32 | 67 | 52.80±3.67 | 11.59 | 0.22 | 6.5 | 9.5 | 7.75±0.34 | 1.09 | 0.14 |
|  | P4-12-3 | 38 | 74 | 58.60±3.78 | 11.95 | 0.20 | 6.5 | 10 | 7.95±0.40 | 1.28 | 0.16 |
|  | P4-12-4 | 42 | 80 | 62.20±3.90 | 12.35 | 0.20 | 6.5 | 10.5 | 8.75±0.40 | 1.27 | 0.15 |
|  | P4-12-5 | 38 | 66 | 56.90±3.00 | 9.48 | 0.17 | 5.5 | 8.5 | 7.55±0.31 | 0.98 | 0.13 |
|  | P4-12-6 | 30 | 70 | 55.60±4.65 | 14.69 | 0.26 | 17.5 | 17 | 17.80±0.12 | 0.27 | 0.02 |
|  | P4-12-7 | 44 | 91 | 64.10±5.27 | 16.65 | 0.26 | 6.5 | 11.5 | 8.50±0.48 | 1.51 | 0.18 |
|  | P4-12-8 | 38 | 74 | 59.40±4.42 | 13.97 | 0.24 | 8 | 10 | 9.05±0.25 | 0.80 | 0.09 |
|  | P4-12-9 | 41 | 73 | 57.40±3.91 | 12.38 | 0.22 | 6.5 | 10.5 | 8.45±0.40 | 1.26 | 0.15 |
|  | P4-12-10 | 39 | 71 | 56.80±3.50 | 11.07 | 0.19 | 13 | 18 | 16.40±0.89 | 1.98 | 0.12 |
|  | P4-15-1 | 51 | 82 | 68.75±6.66 | 13.33 | 0.19 | 7.5 | 12 | 9.00±0.41 | 1.31 | 0.15 |
|  | P4-15-2 | 47 | 77 | 64.00±3.49 | 11.03 | 0.17 | 4.5 | 8 | 5.80±0.33 | 1.06 | 0.18 |
|  | P4-15-3 | 41 | 83 | 65.10±4.75 | 15.01 | 0.23 | 5 | 8.5 | 6.35±0.37 | 1.18 | 0.19 |
|  | P4-15-4 | 41 | 87 | 69.70±4.20 | 13.29 | 0.19 | 9 | 11 | 9.56±0.23 | 0.68 | 0.07 |
|  | P4-15-5 | 42 | 83 | 64.40±4.89 | 15.45 | 0.24 | 6 | 9 | 7.45±0.35 | 1.09 | 0.15 |
|  | P4-15-6 | 39 | 76 | 59.30±3.63 | 11.47 | 0.19 | 7 | 10 | 8.41±0.26 | 0.81 | 0.10 |
|  | P4-15-7 | 77 | 81.5 | 79.25±2.25 | 3.18 | 0.04 | 10 | 10 | 10.00±0 | * | * |
|  | P4-15-8 | 57 | 80 | 67.67±6.69 | 11.59 | 0.17 | 8 | 10 | 9.00±0.58 | 1.00 | 0.11 |
|  | P4-15-9 | 55 | 77 | 68.10±2.58 | 8.17 | 0.12 | 8.5 | 11.5 | 9.67±0.93 | 1.61 | 0.17 |
|  | P4-22-1 | 41 | 94 | 68.87±7.74 | 21.88 | 0.32 | 5.5 | 12 | 10.17±0.99 | 2.42 | 0.24 |
|  | P4-22-2 | 43 | 93 | 68.30±4.60 | 14.54 | 0.21 | 8.5 | 10.5 | 9.30±0.23 | 0.71 | 0.08 |
|  | P4-22-3 | 37 | 74 | 59.00±3.14 | 9.92 | 0.17 | 10 | 13 | 11.55±0.38 | 1.21 | 0.10 |
|  | P4-22-4 | 48 | 91 | 70.80±5.20 | 16.44 | 0.23 | 9 | 11.5 | 9.95±0.29 | 0.93 | 0.09 |
|  | P4-22-5 | 46 | 91 | 68.10±4.51 | 14.27 | 0.21 | 8.5 | 12 | 10.40±0.36 | 1.13 | 0.11 |
|  | P4-22-6 | 49 | 70 | 57.40±2.43 | 7.69 | 0.13 | 8 | 11 | 9.15±0.30 | 0.94 | 0.10 |
|  | P4-22-7 | 53 | 93 | 74.20±3.86 | 12.21 | 0.16 | 8.5 | 12 | 9.90±0.38 | 1.20 | 0.12 |
|  | P4-22-8 | 45 | 96 | 66.30±5.65 | 17.86 | 0.27 | 8.5 | 12 | 10.10±0.36 | 1.15 | 0.11 |
|  | P4-22-9 | 47 | 91 | 66.80±4.91 | 15.52 | 0.23 | 8.5 | 12 | 10.15±0.35 | 1.11 | 0.11 |
|  | P4-22-10 | 38 | 85 | 62.80±4.66 | 14.73 | 0.23 | 4.5 | 5 | 4.75±0.25 | 0.35 | 0.07 |

Here, Min: Minimum, Max: Maximum, SE: Standard Error, Std. Dev.: Standard Deviation, CV: Coefficient of Variation, * means missing values

Supplementary Table 2: Mean, standard error, standard deviation and coefficient of variation of advanced line (**F4 generation**) for spike (g) and spikelet’s spike-1

| Serial Number | Line Number | Weight of Spike (g) | | | | | | Spikelet’s/ Spike | | | |
| --- | --- | --- | --- | --- | --- | --- | --- | --- | --- | --- | --- |
| Min | Max | Mean ± SE | Std. Dev. | CV | Min | Max | Mean ± SE | Std. Dev. | CV |
|  | P3-2-2 | 1.967 | 3.51 | 2.77±0.29 | 0.65 | 0.23 | 18 | 20 | 18.40±0.40 | 0.89 | 0.05 |
|  | P3-2-3 | 0.493 | 1.599 | 0.92±0.13 | 0.41 | 0.44 | 18 | 22 | 20.40±0.58 | 1.84 | 0.09 |
|  | P3-2-5 | 0.656 | 2.048 | 1.22±0.15 | 0.47 | 0.39 | 16 | 24 | 19.00±0.80 | 2.54 | 0.13 |
|  | P3-2-6 | 2.782 | 3.462 | 3.17±0.12 | 0.27 | 0.08 | 14 | 16 | 15.60±0.40 | 0.89 | 0.06 |
|  | P3-2-9 | 0.361 | 1.09 | 0.65±0.07 | 0.21 | 0.33 | 14 | 22 | 17.40±1.12 | 3.53 | 0.20 |
|  | P3-2-10 | 0.456 | 1.928 | 0.88±0.17 | 0.52 | 0.60 | 16 | 24 | 19.40±0.79 | 2.50 | 0.13 |
|  | P3-3-1 | 0.68 | 1.402 | 0.91±0.13 | 0.30 | 0.32 | 14 | 20 | 16.40±1.17 | 2.61 | 0.16 |
|  | P3-3-2 | 0.127 | 1.568 | 0.90±0.14 | 0.43 | 0.48 | 20 | 24 | 21.80±0.47 | 1.48 | 0.07 |
|  | P3-3-3 | 1.349 | 3.002 | 2.02±0.30 | 0.66 | 0.33 | 16 | 18 | 16.40±0.40 | 0.89 | 0.05 |
|  | P3-3-4 | 0.515 | 1.482 | 0.95±0.12 | 0.39 | 0.41 | 16 | 24 | 19.80±0.87 | 2.74 | 0.14 |
|  | P3-3-8 | 0.345 | 0.928 | 0.47±0.06 | 0.18 | 0.38 | 12 | 18 | 14.80±0.80 | 2.53 | 0.17 |
|  | P3-3-10 | 0.539 | 1.544 | 0.89±0.10 | 0.31 | 0.34 | 14 | 26 | 19.00±1.09 | 3.43 | 0.18 |
|  | P3-4-2 | 0.302 | 0.625 | 0.41±0.03 | 0.09 | 0.22 | 12 | 24 | 18.20±1.13 | 3.58 | 0.20 |
|  | P3-4-3 | 0.453 | 1.539 | 1.08±0.11 | 0.35 | 0.32 | 14 | 20 | 17.40±0.73 | 2.32 | 0.13 |
|  | P3-4-4 | 0.763 | 1.722 | 1.24±0.10 | 0.33 | 0.26 | 16 | 22 | 18.40±0.72 | 2.27 | 0.12 |
|  | P3-4-5 | 0.683 | 1.804 | 1.35±0.10 | 0.32 | 0.24 | 12 | 22 | 16.80±0.90 | 2.86 | 0.17 |
|  | P3-4-6 | 2.397 | 2.819 | 2.60±0.08 | 0.18 | 0.07 | 14 | 18 | 16.00±0.63 | 1.41 | 0.09 |
|  | P3-4-10 | 0.913 | 1.771 | 1.21±0.10 | 0.31 | 0.25 | 14 | 20 | 17.20±0.68 | 2.15 | 0.12 |
|  | P3-5-1 | 0.501 | 2.009 | 1.27±0.17 | 0.52 | 0.41 | 10 | 18 | 14.60±0.90 | 2.84 | 0.19 |
|  | P3-5-2 | 2.263 | 3.546 | 3.09±0.22 | 0.50 | 0.16 | 14 | 18 | 16.00±0.89 | 2.00 | 0.13 |
|  | P3-5-3 | 0.586 | 1.737 | 1.00±0.15 | 0.49 | 0.49 | 14 | 37 | 18.60±2.14 | 6.75 | 0.36 |
|  | P3-5-4 | 0.524 | 2.423 | 1.33±0.19 | 0.60 | 0.45 | 14 | 20 | 16.40±0.58 | 1.84 | 0.11 |
|  | P3-5-5 | 0.964 | 1.765 | 1.35±0.08 | 0.27 | 0.20 | 12 | 20 | 15.40±0.73 | 2.32 | 0.15 |
|  | P3-5-6 | 1.526 | 1.705 | 1.59±0.06 | 0.10 | 0.06 | 14 | 18 | 15.33±1.33 | 2.31 | 0.15 |
|  | P3-11-1 | * | * | * | * | * | * | * | * | * | * |
|  | P3-11-2 | * | * | * | * | * | * | * | * | * | * |
|  | P3-11-3 | 2.337 | 3.127 | 2.61±0.14 | 0.32 | 0.12 | * | * | * | * | * |
|  | P3-11-4 | * | * | * | * | * | 18 | 21 | 20.00±0.55 | 1.22 | 0.06 |
|  | P3-11-5 | * | * | * | * | * | * | * | * | * | * |
|  | P3-11-6 | * | * | * | * | * | * | * | * | * | * |
|  | P3-11-7 | 0.305 | 1.927 | 0.82±0.24 | 0.62 | 0.76 | * | * | * | * | * |
|  | P3-11-8 | * | * | * | * | * | 10 | 22 | 16.86±1.50 | 3.98 | 0.24 |
|  | P3-11-9 | 1.077 | 1.906 | 1.51±0.09 | 0.29 | 0.19 | 12 | 20 | 16.60±0.73 | 2.32 | 0.14 |
|  | P3-17-1 | 0.567 | 1.32 | 1.04±0.09 | 0.28 | 0.27 | 12 | 16 | 13.60±0.58 | 1.84 | 0.14 |
|  | P3-17-2 | 0.567 | 1.31 | 1.03±0.08 | 0.26 | 0.26 | 12 | 22 | 16.00±0.94 | 2.98 | 0.19 |
|  | P3-17-3 | 0.562 | 1.423 | 0.99±0.09 | 0.27 | 0.27 | 14 | 20 | 17.00±0.68 | 2.16 | 0.13 |
|  | P3-17-4 | 0.477 | 1.794 | 0.94±0.13 | 0.40 | 0.23 | 14 | 22 | 17.40±0.73 | 2.32 | 0.13 |
|  | P3-17-5 | 0.95 | 1.234 | 1.08±0.08 | 0.14 | 0.13 | 16 | 22 | 20.00±2.00 | 3.46 | 0.17 |
|  | P3-17-6 | 0.548 | 1.238 | 0.84±0.16 | 0.32 | 0.38 | 14 | 18 | 16.00±0.73 | 1.63 | 0.10 |
|  | P3-17-7 | 0.562 | 1.448 | 1.18±0.09 | 0.30 | 0.25 | 12 | 22 | 16.60±0.90 | 2.84 | 0.17 |
|  | P3-17-8 | 0.713 | 1.716 | 1.25±0.10 | 0.30 | 0.24 | 16 | 20 | 17.80±0.55 | 1.75 | 0.10 |
|  | P3-17-9 | 0.272 | 0.664 | 0.49±0.09 | 0.18 | 0.37 | 12 | 18 | 15.00±1.29 | 2.58 | 0.17 |
|  | P3-17-10 | 0.608 | 1.768 | 1.25±0.11 | 0.35 | 0.28 | 12 | 20 | 16.80±0.74 | 2.35 | 0.14 |
|  | P3-18-1 | 0.532 | 1.24 | 0.86±0.06 | 0.20 | 0.24 | 12 | 16 | 14.60±0.99 | 3.13 | 0.21 |
|  | P3-18-2 | 0.586 | 2.037 | 1.14±0.13 | 0.42 | 0.37 | 14 | 20 | 16.80±0.61 | 1.93 | 0.12 |
|  | P3-18-3 | 1.922 | 2.604 | 2.37±0.12 | 0.26 | 0.11 | 14 | 18 | 15.60±0.75 | 1.67 | 0.11 |
|  | P3-18-4 | 0.501 | 1.318 | 0.96±0.09 | 0.27 | 0.29 | 14 | 20 | 16.60±0.73 | 2.32 | 0.14 |
|  | P3-18-5 | 0.527 | 1.295 | 0.90±0.08 | 0.25 | 0.27 | 12 | 18 | 15.20±0.74 | 2.35 | 0.15 |
|  | P3-18-6 | 0.53 | 1.141 | 0.86±0.10 | 0.33 | 0.38 | 12 | 18 | 15.60±0.65 | 2.07 | 0.13 |
|  | P3-18-7 | 0.532 | 1.486 | 1.08±0.08 | 0.26 | 0.24 | 10 | 20 | 15.60±0.98 | 3.10 | 0.20 |
|  | P3-18-8 | 0.538 | 1.222 | 0.74±0.13 | 0.29 | 0.40 | 12 | 20 | 14.80±1.50 | 3.35 | 0.23 |
|  | P3-18-9 | 0.593 | 1.238 | 0.97±0.06 | 0.19 | 0.19 | 12 | 20 | 14.60±0.79 | 2.50 | 0.17 |
|  | P3-18-10 | 2.19 | 3.204 | 2.60±0.16 | 0.37 | 0.14 | 14 | 20 | 16.40±1.03 | 2.30 | 0.14 |
|  | P3-21-1 | 1.028 | 1.962 | 1.31±0.10 | 0.30 | 0.23 | 12 | 20 | 15.80±0.76 | 2.39 | 0.15 |
|  | P3-21-2 | 0.556 | 1.838 | 1.09±0.10 | 0.33 | 0.30 | 14 | 22 | 17.20±0.85 | 2.70 | 0.16 |
|  | P3-21-3 | 0.754 | 1.62 | 1.18±0.08 | 0.27 | 0.22 | 12 | 18 | 15.80±0.63 | 1.99 | 0.13 |
|  | P3-21-4 | 0.837 | 1.556 | 1.12±0.07 | 0.21 | 0.19 | 12 | 20 | 16.00±0.73 | 2.31 | 0.14 |
|  | P3-21-5 | 0.822 | 1.832 | 1.12±0.10 | 0.30 | 0.27 | 14 | 20 | 17.40±0.79 | 2.50 | 0.14 |
|  | P3-21-6 | 0.893 | 1.724 | 1.27±0.08 | 0.26 | 0.20 | 16 | 22 | 19.40±0.60 | 1.90 | 0.10 |
|  | P3-21-7 | 0.687 | 1.387 | 1.02±0.08 | 0.26 | 0.25 | 10 | 20 | 14.80±1.12 | 3.55 | 0.24 |
|  | P3-21-8 | 0.37 | 1.558 | 0.97±0.12 | 0.38 | 0.40 | 10 | 22 | 17.60±1.29 | 4.09 | 0.23 |
|  | P3-21-9 | 0.676 | 1.122 | 0.90±0.05 | 0.16 | 0.17 | 16 | 18 | 17.00±0.33 | 1.05 | 0.06 |
|  | P3-21-10 | 1.578 | 2.521 | 2.08±0.17 | 0.39 | 0.19 | 14 | 16 | 14.80±0.49 | 1.10 | 0.07 |
|  | P3-24-1 | 0.536 | 1.278 | 0.99±0.07 | 0.23 | 0.23 | 12 | 18 | 14.60±0.60 | 1.90 | 0.13 |
|  | P3-24-2 | 0.764 | 1.298 | 1.01±0.07 | 0.23 | 0.22 | 12 | 20 | 16.40±0.83 | 2.63 | 0.16 |
|  | P3-24-3 | 0.635 | 1.727 | 1.10±0.10 | 0.33 | 0.30 | 12 | 22 | 19.00±1.09 | 3.43 | 0.18 |
|  | P3-24-4 | 0.452 | 1.385 | 0.77±0.10 | 0.31 | 0.40 | 12 | 22 | 16.40±1.15 | 3.63 | 0.22 |
|  | P3-24-5 | 0.54 | 1.184 | 0.96±0.06 | 0.19 | 0.20 | 12 | 16 | 14.00±0.60 | 1.89 | 0.13 |
|  | P3-24-6 | 0.437 | 1.695 | 1.00±0.13 | 0.40 | 0.40 | 12 | 20 | 16.20±0.81 | 2.57 | 0.16 |
|  | P3-24-7 | 0.502 | 1.167 | 0.82±0.08 | 0.25 | 0.30 | 12 | 20 | 15.40±0.73 | 2.32 | 0.15 |
|  | P3-24-8 | 0.498 | 1.482 | 1.01±0.09 | 0.29 | 0.29 | 14 | 20 | 17.00±0.61 | 1.94 | 0.11 |
|  | P3-24-9 | 0.425 | 1.545 | 0.82±0.10 | 0.30 | 0.37 | 10 | 24 | 15.00±1.27 | 4.03 | 0.27 |
|  | P3-24-10 | 1.798 | 2.702 | 2.27±0.17 | 0.38 | 0.17 | 14 | 21 | 17.80±1.28 | 2.86 | 0.16 |
|  | P3-28-1 | 0.765 | 1.654 | 1.18±0.10 | 0.32 | 0.27 | 14 | 22 | 18.20±0.76 | 2.39 | 0.13 |
|  | P3-28-3 | 2.11 | 3.015 | 2.55±0.19 | 0.42 | 0.16 | 16 | 20 | 18.00±0.63 | 1.41 | 0.08 |
|  | P3-28-4 | 0.431 | 1.788 | 1.04±0.16 | 0.51 | 0.49 | 14 | 26 | 19.60±1.22 | 3.86 | 0.20 |
|  | P3-28-5 | 0.389 | 1.182 | 0.64±0.15 | 0.32 | 0.51 | 14 | 22 | 17.60±1.47 | 3.29 | 0.19 |
|  | P3-28-6 | 0.549 | 1.634 | 1.07±0.11 | 0.35 | 0.33 | 14 | 20 | 17.60±0.65 | 2.07 | 0.12 |
|  | P3-28-7 | 0.481 | 0.751 | 0.62±0.14 | 0.19 | 0.31 | 16 | 22 | 19.00±3.00 | 4.24 | 0.22 |
|  | P3-28-8 | 0.543 | 1.523 | 0.91±0.09 | 0.28 | 0.31 | 14 | 22 | 19.40±0.90 | 2.84 | 0.15 |
|  | P3-28-9 | 0.189 | 1.408 | 0.68±0.12 | 0.37 | 0.55 | 10 | 20 | 15.20±1.16 | 3.68 | 0.24 |
|  | P3-28-10 | 0.214 | 1.425 | 0.57±0.18 | 0.44 | 0.76 | 8 | 22 | 13.67±2.36 | 5.28 | 0.39 |
|  | P3-29-1 | 0.615 | 1.096 | 0.91±0.05 | 0.16 | 0.17 | 16 | 18 | 17.00±0.33 | 1.05 | 0.06 |
|  | P3-29-2 | 1.465 | 2.989 | 2.34±0.25 | 0.56 | 0.24 | 14 | 18 | 16.00±0.89 | 2.00 | 0.13 |
|  | P3-29-4 | 1.495 | 2.202 | 1.74±0.12 | 0.27 | 0.16 | 14 | 18 | 16.00±0.89 | 2.00 | 0.13 |
|  | P3-29-5 | 0.434 | 1.081 | 0.68±0.06 | 0.20 | 0.29 | 12 | 18 | 15.20±0.53 | 1.69 | 0.11 |
|  | P3-29-6 | 0.334 | 0.915 | 0.58±0.07 | 0.19 | 0.33 | 12 | 20 | 16.75±1.00 | 2.82 | 0.17 |
|  | P3-29-7 | 0.42 | 1.24 | 0.84±0.08 | 0.25 | 0.29 | 16 | 22 | 18.20±0.63 | 1.99 | 0.11 |
|  | P3-29-8 | 0.244 | 0.981 | 0.45±0.07 | 0.23 | 0.51 | 8 | 20 | 16.00±1.15 | 3.65 | 0.23 |
|  | P3-29-9 | 0.382 | 1.528 | 0.90±0.09 | 0.30 | 0.33 | 16 | 20 | 18.20±0.55 | 1.75 | 0.10 |
|  | P3-29-10 | 1.864 | 2.596 | 2.38±0.13 | 0.29 | 0.12 | 14 | 20 | 17.20±1.02 | 2.28 | 0.13 |
|  | P3-30-1 | 0.213 | 0.519 | 0.38±0.04 | 0.10 | 0.28 | 8 | 22 | 17.71±1.77 | 4.68 | 0.26 |
|  | P3-30-3 | 0.362 | 0.739 | 0.56±0.06 | 0.17 | 0.29 | 16 | 22 | 18.33±1.09 | 2.66 | 0.14 |
|  | P3-30-4 | 0.55 | 1.498 | 0.90±0.11 | 0.36 | 0.40 | 10 | 20 | 16.40±0.93 | 2.95 | 0.18 |
|  | P3-30-5 | 0.27 | 0.694 | 0.42±0.05 | 0.15 | 0.37 | 12 | 24 | 19.40±1.19 | 3.78 | 0.19 |
|  | P3-30-6 | 0.227 | 0.371 | 0.28±0.04 | 0.08 | 0.27 | 12 | 20 | 15.33±2.40 | 4.16 | 0.27 |
|  | P3-30-7 | 0.304 | 1.3 | 0.75±0.11 | 0.35 | 0.47 | 12 | 20 | 16.40±0.83 | 2.63 | 0.16 |
|  | P3-30-8 | 0.226 | 1.068 | 0.57±0.09 | 0.29 | 0.51 | 12 | 22 | 17.60±0.93 | 2.95 | 0.17 |
|  | P3-32-1 | 0.442 | 1.553 | 1.14±0.10 | 0.33 | 0.29 | 12 | 22 | 18.00±0.89 | 2.83 | 0.16 |
|  | P3-32-2 | 0.477 | 1.229 | 0.75±0.24 | 0.41 | 0.55 | 16 | 20 | 17.33±1.33 | 2.31 | 0.13 |
|  | P3-32-3 | 0.348 | 1.536 | 0.82±0.12 | 0.38 | 0.47 | 14 | 26 | 19.60±1.15 | 3.63 | 0.19 |
|  | P3-32-4 | 0.288 | 1.23 | 0.67±0.12 | 0.37 | 0.56 | 12 | 20 | 15.80±0.76 | 2.39 | 0.15 |
|  | P3-32-5 | 0.327 | 1.392 | 0.71±0.10 | 0.32 | 0.45 | 14 | 22 | 16.60±0.73 | 2.32 | 0.13 |
|  | P3-32-6 | 0.478 | 2.342 | 1.30±0.33 | 0.74 | 0.57 | 12 | 22 | 17.60±1.72 | 3.85 | 0.22 |
|  | P3-32-7 | 0.461 | 1.552 | 1.09±0.11 | 0.35 | 0.32 | 10 | 20 | 16.00±0.94 | 2.98 | 0.19 |
|  | P3-32-8 | 0.45 | 1.463 | 0.91±0.11 | 0.35 | 0.38 | 14 | 22 | 17.60±1.02 | 3.24 | 0.18 |
|  | P3-73-4 | 0.633 | 1.678 | 1.13±0.30 | 0.52 | 0.46 | 12 | 18 | 15.33±1.76 | 3.06 | 0.20 |
|  | P3-73-5 | 0.723 | 1.769 | 1.35±0.10 | 0.31 | 0.23 | 14 | 20 | 17.40±0.73 | 2.32 | 0.13 |
|  | P3-73-6 | 0.559 | 1.946 | 1.20±0.14 | 0.43 | 0.36 | 10 | 18 | 14.60±0.90 | 2.84 | 0.19 |
|  | P3-73-7 | * | * | * | * | * | * | * | * | * | * |
|  | P3-73-8 | 0.573 | 1.57 | 1.25±0.09 | 0.30 | 0.24 | 10 | 16 | 14.00±0.67 | 2.11 | 0.15 |
|  | P3-73-10 | 0.394 | 1.577 | 1.11±0.36 | 0.63 | 0.57 | 10 | 18 | 14.00±1.26 | 4.00 | 0.29 |
|  | P3-89-2 | 0.361 | 1.607 | 0.94±0.14 | 0.44 | 0.47 | 10 | 24 | 16.60±1.33 | 4.22 | 0.25 |
|  | P3-89-4 | 0.167 | 0.694 | 0.35±0.08 | 0.21 | 0.59 | 10 | 16 | 12.67±0.84 | 2.07 | 0.16 |
|  | P3-89-7 | 0.365 | 0.71 | 0.54±0.17 | 0.24 | 0.45 | 12 | 14 | 13.00±1.00 | 1.41 | 0.11 |
|  | P3-89-9 | 0.218 | 0.609 | 0.41±0.11 | 0.21 | 0.53 | 10 | 20 | 14.50±2.63 | 5.26 | 0.36 |
|  | P3-89-10 | 0.25 | 1.567 | 0.65±0.13 | 0.40 | 0.62 | 8 | 20 | 12.20±1.59 | 5.03 | 0.41 |
|  | P4-4-3 | 0.377 | 0.526 | 0.45±0.02 | 0.06 | 0.13 | 14 | 20 | 17.67±1.20 | 2.94 | 0.17 |
|  | P4-4-4 | 0.392 | 0.872 | 0.58±0.05 | 0.17 | 0.28 | 14 | 24 | 18.40±1.07 | 3.37 | 0.18 |
|  | P4-4-6 | 0.591 | 1.571 | 0.97±0.10 | 0.32 | 0.33 | 14 | 22 | 19.80±0.87 | 2.74 | 0.14 |
|  | P4-4-10 | 0.432 | 1.367 | 0.86±0.10 | 0.32 | 0.37 | 12 | 24 | 18.20±1.50 | 4.76 | 0.26 |
|  | P4-9-1 | 0.363 | 0.53 | 0.45±0.02 | 0.06 | 0.12 | 12 | 18 | 14.40±0.65 | 2.07 | 0.14 |
|  | P4-9-2 | 0.301 | 0.697 | 0.43±0.06 | 0.14 | 0.31 | 6 | 14 | 11.00±1.34 | 3.29 | 0.30 |
|  | P4-9-3 | 0.457 | 1.342 | 0.85±0.10 | 0.32 | 0.38 | 12 | 22 | 15.40±1.19 | 3.78 | 0.25 |
|  | P4-9-4 | 0.554 | 0.778 | 0.68±0.04 | 0.10 | 0.14 | 10 | 18 | 14.43±0.97 | 2.57 | 0.18 |
|  | P4-9-5 | 0.739 | 1.376 | 1.02±0.07 | 0.22 | 0.22 | 14 | 20 | 16.40±0.58 | 1.84 | 0.11 |
|  | P4-9-6 | 0.805 | 1.642 | 1.12±0.08 | 0.25 | 0.22 | 12 | 18 | 15.20±0.61 | 1.93 | 0.13 |
|  | P4-9-7 | 0.739 | 1.208 | 0.98±0.05 | 0.16 | 0.16 | 12 | 18 | 15.00±0.61 | 1.94 | 0.13 |
|  | P4-9-8 | 0.385 | 0.89 | 0.64±0.15 | 0.25 | 0.40 | 12 | 14 | 12.67±0.67 | 1.15 | 0.09 |
|  | P4-9-9 | 0.417 | 0.972 | 0.69±0.05 | 0.17 | 0.25 | 10 | 16 | 13.00±0.54 | 1.70 | 0.13 |
|  | P4-9-10 | 0.348 | 0.556 | 0.43±0.05 | 0.09 | 0.21 | 10 | 16 | 12.67±1.76 | 3.06 | 0.24 |
|  | P4-12-1 | 0.542 | 1.218 | 0.93±0.07 | 0.21 | 0.22 | 8 | 20 | 14.80±1.08 | 3.43 | 0.23 |
|  | P4-12-2 | 0.493 | 1.35 | 0.87±0.08 | 0.25 | 0.29 | 10 | 16 | 12.80±0.68 | 2.15 | 0.17 |
|  | P4-12-3 | 0.734 | 1.299 | 0.94±0.07 | 0.22 | 0.23 | 12 | 20 | 15.60±0.78 | 2.46 | 0.16 |
|  | P4-12-4 | 0.582 | 1.344 | 0.90±0.09 | 0.27 | 0.30 | 12 | 20 | 16.40±0.83 | 2.63 | 0.16 |
|  | P4-12-5 | 0.664 | 1.386 | 0.91±0.08 | 0.26 | 0.28 | 12 | 16 | 14.20±0.47 | 1.48 | 0.10 |
|  | P4-12-6 | 2.197 | 3.174 | 2.47±0.18 | 0.40 | 0.16 | 18 | 20 | 18.80±0.49 | 1.10 | 0.06 |
|  | P4-12-7 | 0.468 | 1.321 | 0.83±0.08 | 0.24 | 0.29 | 10 | 20 | 13.40±0.95 | 2.99 | 0.22 |
|  | P4-12-8 | 0.846 | 1.318 | 1.01±0.05 | 0.15 | 0.15 | 14 | 20 | 16.60±0.67 | 2.12 | 0.13 |
|  | P4-12-9 | 0.471 | 1.171 | 0.83±0.08 | 0.24 | 0.29 | 12 | 18 | 14.80±0.68 | 2.15 | 0.15 |
|  | P4-12-10 | 1.91 | 2.571 | 2.18±0.12 | 0.28 | 0.13 | 16 | 18 | 17.50±0.50 | 1.00 | 0.06 |
|  | P4-15-1 | 0.665 | 1.532 | 0.91±0.09 | 0.29 | 0.32 | 10 | 18 | 13.40±0.79 | 2.50 | 0.19 |
|  | P4-15-2 | 0.314 | 0.702 | 0.50±0.05 | 0.14 | 0.29 | 8 | 12 | 10.20±0.47 | 1.48 | 0.14 |
|  | P4-15-3 | 0.517 | 1.154 | 0.68±0.06 | 0.20 | 0.29 | 6 | 10 | 8.60±0.43 | 1.35 | 0.16 |
|  | P4-15-4 | 0.472 | 1.006 | 0.74±0.06 | 0.18 | 0.24 | 8 | 16 | 12.00±1.05 | 3.32 | 0.28 |
|  | P4-15-5 | 0.667 | 1.13 | 0.88±0.05 | 0.16 | 0.19 | 8 | 16 | 11.40±0.79 | 2.50 | 0.22 |
|  | P4-15-6 | 0.855 | 1.292 | 1.07±0.04 | 0.13 | 0.12 | 10 | 16 | 12.40±0.65 | 2.07 | 0.17 |
|  | P4-15-7 | * | * | * | * | * | * | * | * | * | * |
|  | P4-15-8 | 0.11 | 0.4 | 0.21±0.09 | 0.16 | 0.78 | 6 | 10 | 8.00±1.15 | 2.00 | 0.25 |
|  | P4-15-9 | 0.135 | 0.292 | 0.22±0.05 | 0.08 | 0.36 | 4 | 8 | 6.00±1.15 | 2.00 | 0.33 |
|  | P4-22-1 | 0.132 | 0.973 | 0.40±0.12 | 0.31 | 0.77 | 8 | 20 | 13.67±1.82 | 4.46 | 0.33 |
|  | P4-22-2 | 0.467 | 1.62 | 0.95±0.11 | 0.34 | 0.36 | 14 | 22 | 16.00±0.79 | 2.49 | 0.16 |
|  | P4-22-3 | 0.667 | 1.097 | 0.88±0.04 | 0.12 | 0.13 | 12 | 20 | 16.00±0.84 | 2.67 | 0.17 |
|  | P4-22-4 | 0.525 | 1.209 | 0.95±0.06 | 0.20 | 0.22 | 12 | 18 | 16.00±0.67 | 2.11 | 0.13 |
|  | P4-22-5 | 0.484 | 1.447 | 1.09±0.09 | 0.27 | 0.25 | 12 | 22 | 17.40±0.95 | 2.99 | 0.17 |
|  | P4-22-6 | 0.748 | 1.188 | 0.90±0.05 | 0.14 | 0.16 | 12 | 18 | 15.20±0.53 | 1.69 | 0.11 |
|  | P4-22-7 | 0.86 | 1.346 | 1.06±0.05 | 0.15 | 0.14 | 12 | 22 | 16.40±1.02 | 3.24 | 0.20 |
|  | P4-22-8 | 0.652 | 1.315 | 1.08±0.07 | 0.21 | 0.19 | 16 | 22 | 17.80±0.70 | 2.20 | 0.12 |
|  | P4-22-9 | 0.398 | 0.938 | 0.61±0.05 | 0.16 | 0.26 | 12 | 18 | 13.60±0.65 | 2.07 | 0.15 |
|  | P4-22-10 | 0.225 | 0.281 | 0.25±0.03 | 0.04 | 0.16 | 6 | 6 | 6.00±0 | * | * |

Here, Min: Minimum, Max: Maximum, SE: Standard Error, Std. Dev.: Standard Deviation, CV: Coefficient of Variation, * means missing values

Supplementary Table 3: Mean, standard error, standard deviation and coefficient of variation of advanced line (**F4 generation**) for grains spike-1 and 100 seed weight (g)

| Serial Number | Line Number | Grains Spike-1 | | | | | 100 Seed Weight (g) |
| --- | --- | --- | --- | --- | --- | --- | --- |
| Min | Max | Mean ± SE | Std. Dev. | CV | Mean |
|  | P3-2-2 | 29 | 57 | 45.20±5.44 | 12.17 | 0.27 | 4.28 |
|  | P3-2-3 | 6 | 37 | 15.60±3.35 | 10.60 | 0.68 | 2.10 |
|  | P3-2-5 | 3 | 39 | 17.10±3.57 | 11.28 | 0.66 | 2.11 |
|  | P3-2-6 | 47 | 64 | 53.00±2.97 | 6.63 | 0.13 | 4.68 |
|  | P3-2-9 | 4 | 23 | 8.60±1.74 | 5.50 | 0.64 | 2.11 |
|  | P3-2-10 | 3 | 24 | 10.90±3.23 | 10.21 | 0.94 | 2.46 |
|  | P3-3-1 | 3 | 18 | 11.60±2.84 | 6.35 | 0.55 | 1.04 |
|  | P3-3-2 | 5 | 31 | 15.40±2.80 | 8.86 | 0.58 | 1.54 |
|  | P3-3-3 | 26 | 48 | 34.60±4.02 | 8.99 | 0.26 | 3.83 |
|  | P3-3-4 | 6 | 24 | 14.80±2.13 | 6.73 | 0.45 | 1.53 |
|  | P3-3-8 | 3 | 10 | 6.20±0.66 | 2.10 | 0.34 | 0.56 |
|  | P3-3-10 | 7 | 31 | 14.30±2.70 | 8.53 | 0.60 | 1.54 |
|  | P3-4-2 | 0 | 6 | 1.60±0.72 | 2.27 | 1.42 | 1.80 |
|  | P3-4-3 | 7 | 34 | 18.10±3.40 | 10.75 | 0.59 | 1.42 |
|  | P3-4-4 | 11 | 48 | 26.90±3.57 | 11.28 | 0.42 | 1.63 |
|  | P3-4-5 | 6 | 40 | 27.70±3.81 | 12.06 | 0.44 | 1.79 |
|  | P3-4-6 | 40 | 57 | 48.40±3.06 | 6.84 | 0.14 | 4.17 |
|  | P3-4-10 | 15 | 37 | 22.10±2.59 | 8.20 | 0.37 | 1.60 |
|  | P3-5-1 | 8 | 58 | 28.60±4.75 | 15.01 | 0.52 | 2.03 |
|  | P3-5-2 | 52 | 64 | 56.80±2.03 | 4.55 | 0.08 | 3.57 |
|  | P3-5-3 | 8 | 33 | 17.50±2.21 | 6.98 | 0.40 | 1.65 |
|  | P3-5-4 | 10 | 28 | 20.30±1.76 | 5.58 | 0.27 | 1.80 |
|  | P3-5-5 | 18 | 43 | 29.70±2.68 | 8.49 | 0.29 | 1.83 |
|  | P3-5-6 | 31 | 38 | 33.67±2.19 | 3.79 | 0.11 | 1.67 |
|  | P3-11-1 | * | * | * | * | * | 1.64 |
|  | P3-11-2 | * | * | * | * | * | * |
|  | P3-11-3 | 47 | 60 | 55.00±2.17 | 4.85 | 0.09 | 3.60 |
|  | P3-11-4 | * | * | * | * | * | * |
|  | P3-11-5 | * | * | * | * | * | 2.30 |
|  | P3-11-6 | * | * | * | * | * | 1.82 |
|  | P3-11-7 | 4 | 31 | 15.14±4.21 | 11.14 | 0.74 | 1.84 |
|  | P3-11-8 | * | * | * | * | * | 1.82 |
|  | P3-11-9 | 21 | 48 | 33.30±3.00 | 9.50 | 0.29 | 1.60 |
|  | P3-17-1 | 6 | 34 | 22.20±3.07 | 9.70 | 0.44 | 1.81 |
|  | P3-17-2 | 11 | 27 | 17.90±1.51 | 4.77 | 0.27 | 1.88 |
|  | P3-17-3 | 2 | 25 | 14.70±2.02 | 6.38 | 0.43 | 1.68 |
|  | P3-17-4 | 4 | 28 | 15.00±2.39 | 7.54 | 0.50 | 2.45 |
|  | P3-17-5 | 9 | 24 | 17.33±4.41 | 7.64 | 0.44 | 2.14 |
|  | P3-17-6 | 7 | 26 | 16.40±2.64 | 8.35 | 0.51 | 1.90 |
|  | P3-17-7 | 4 | 28 | 18.30±2.42 | 7.65 | 0.42 | 2.15 |
|  | P3-17-8 | 7 | 40 | 23.50±3.54 | 11.21 | 0.48 | 2.31 |
|  | P3-17-9 | 0 | 17 | 6.25±3.90 | 7.80 | 1.25 | 4.52 |
|  | P3-17-10 | 9 | 46 | 23.70±3.71 | 11.73 | 0.49 | 2.81 |
|  | P3-18-1 | 0 | 25 | 13.80±2.30 | 7.27 | 0.53 | 1.52 |
|  | P3-18-2 | 5 | 33 | 18.60±2.55 | 8.06 | 0.43 | 1.62 |
|  | P3-18-3 | 43 | 55 | 49.00±2.28 | 5.10 | 0.10 | 3.04 |
|  | P3-18-4 | 7 | 28 | 15.50±1.77 | 5.60 | 0.36 | 1.59 |
|  | P3-18-5 | 4 | 26 | 18.30±2.08 | 6.58 | 0.36 | 1.07 |
|  | P3-18-6 | 7 | 23 | 14.60±1.45 | 4.60 | 0.32 | 1.60 |
|  | P3-18-7 | 10 | 32 | 19.30±2.33 | 7.38 | 0.38 | 1.37 |
|  | P3-18-8 | 5 | 27 | 12.40±4.51 | 10.09 | 0.81 | 1.22 |
|  | P3-18-9 | 12 | 36 | 21.80±2.11 | 6.66 | 0.31 | 1.20 |
|  | P3-18-10 | 45 | 62 | 53.00±3.21 | 7.18 | 0.14 | 3.55 |
|  | P3-21-1 | 11 | 55 | 25.90±4.12 | 13.04 | 0.50 | 1.71 |
|  | P3-21-2 | 1 | 30 | 15.30±3.06 | 9.68 | 0.63 | 1.50 |
|  | P3-21-3 | 7 | 32 | 20.60±2.51 | 7.93 | 0.39 | 1.96 |
|  | P3-21-4 | 9 | 29 | 18.70±2.21 | 6.98 | 0.37 | 1.45 |
|  | P3-21-5 | 5 | 29 | 15.40±2.38 | 7.53 | 0.49 | 1.21 |
|  | P3-21-6 | 9 | 30 | 16.00±2.31 | 7.32 | 0.46 | 1.10 |
|  | P3-21-7 | 10 | 23 | 16.20±1.44 | 4.57 | 0.28 | 1.36 |
|  | P3-21-8 | 9 | 41 | 18.80±3.18 | 10.04 | 0.53 | 1.65 |
|  | P3-21-9 | 2 | 15 | 9.30±1.45 | 4.57 | 0.49 | 1.24 |
|  | P3-21-10 | 32 | 46 | 39.20±2.82 | 6.30 | 0.16 | 3.59 |
|  | P3-24-1 | 8 | 30 | 18.30±2.36 | 7.47 | 0.41 | 1.43 |
|  | P3-24-2 | 7 | 30 | 20.80±2.45 | 7.76 | 0.37 | 1.38 |
|  | P3-24-3 | 16 | 46 | 27.10±3.20 | 10.10 | 0.37 | 1.37 |
|  | P3-24-4 | 7 | 26 | 15.20±1.85 | 5.85 | 0.38 | 1.22 |
|  | P3-24-5 | 10 | 35 | 19.60±2.45 | 7.76 | 0.40 | 1.63 |
|  | P3-24-6 | 7 | 39 | 18.10±3.87 | 12.25 | 0.68 | 1.13 |
|  | P3-24-7 | 5 | 36 | 21.00±3.15 | 9.95 | 0.47 | 1.61 |
|  | P3-24-8 | 15 | 49 | 28.80±3.06 | 9.67 | 0.34 | 1.33 |
|  | P3-24-9 | 6 | 21 | 13.20±1.47 | 4.66 | 0.35 | 1.43 |
|  | P3-24-10 | 41 | 52 | 48.40±1.94 | 4.34 | 0.09 | 2.65 |
|  | P3-28-1 | 7 | 38 | 24.90±3.35 | 10.60 | 0.43 | 1.34 |
|  | P3-28-3 | 39 | 57 | 47.40±3.53 | 7.89 | 0.17 | 3.90 |
|  | P3-28-4 | 5 | 41 | 18.80±4.13 | 13.05 | 0.69 | 1.67 |
|  | P3-28-5 | 0 | 23 | 8.40±3.85 | 8.62 | 1.03 | 5.44 |
|  | P3-28-6 | 7 | 30 | 18.30±2.73 | 8.64 | 0.47 | 1.38 |
|  | P3-28-7 | 5 | 9 | 7.00±2.00 | 2.83 | 0.40 | 1.56 |
|  | P3-28-8 | 5 | 39 | 16.70±3.22 | 10.18 | 0.61 | 1.48 |
|  | P3-28-9 | 3 | 31 | 12.20±2.54 | 8.04 | 0.66 | 1.64 |
|  | P3-28-10 | 3 | 20 | 9.60±3.50 | 7.83 | 0.82 | 1.21 |
|  | P3-29-1 | * | * | * | * | * | 1.72 |
|  | P3-29-2 | 22 | 49 | 39.80±4.64 | 10.38 | 0.26 | 4.22 |
|  | P3-29-4 | 21 | 35 | 26.40±2.32 | 5.18 | 0.20 | 3.61 |
|  | P3-29-5 | 7 | 22 | 12.60±1.50 | 4.74 | 0.38 | 1.92 |
|  | P3-29-6 | 1 | 14 | 7.50±1.39 | 3.93 | 0.52 | 1.53 |
|  | P3-29-7 | 6 | 23 | 13.40±2.01 | 6.35 | 0.47 | 1.22 |
|  | P3-29-8 | 1 | 14 | 4.80±1.22 | 3.85 | 0.80 | * |
|  | P3-29-9 | 3 | 30 | 11.30±2.72 | 8.59 | 0.76 | 1.50 |
|  | P3-29-10 | 29 | 44 | 39.60±2.73 | 6.11 | 0.15 | 4.41 |
|  | P3-30-1 | 0 | 8 | 4.14±1.18 | 3.13 | 0.76 | * |
|  | P3-30-3 | 2 | 13 | 8.00±1.40 | 3.70 | 0.46 | * |
|  | P3-30-4 | 3 | 25 | 14.30±2.55 | 8.07 | 0.56 | * |
|  | P3-30-5 | 0 | 8 | 3.00±0.89 | 2.83 | 0.94 | * |
|  | P3-30-6 | 0 | 14 | 5.00±4.51 | 7.81 | 1.56 | 2.48 |
|  | P3-30-7 | 0 | 29 | 13.80±2.97 | 9.39 | 0.68 | 1.35 |
|  | P3-30-8 | 0 | 25 | 9.80±2.58 | 8.15 | 0.83 | 1.40 |
|  | P3-32-1 | 2 | 38 | 21.60±3.64 | 11.52 | 0.53 | * |
|  | P3-32-2 | 5 | 25 | 12.67±6.23 | 10.79 | 0.85 | * |
|  | P3-32-3 | 0 | 29 | 10.20±2.52 | 7.97 | 0.78 | * |
|  | P3-32-4 | 1 | 33 | 11.80±3.66 | 11.56 | 0.98 | * |
|  | P3-32-5 | 1 | 30 | 11.70±3.26 | 10.31 | 0.88 | 1.58 |
|  | P3-32-6 | 6 | 38 | 15.17±4.85 | 11.87 | 0.78 | 1.54 |
|  | P3-32-7 | 5 | 43 | 23.20±3.85 | 12.18 | 0.53 | 1.50 |
|  | P3-32-8 | 3 | 38 | 12.89±3.48 | 11.01 | 0.85 | 1.02 |
|  | P3-73-4 | 5 | 33 | 18.33±8.11 | 14.05 | 0.77 | * |
|  | P3-73-5 | 18 | 49 | 32.90±2.99 | 9.47 | 0.29 | * |
|  | P3-73-6 | 17 | 48 | 30.44±3.50 | 11.08 | 0.36 | 1.59 |
|  | P3-73-7 | * | * | * | * | * | 1.85 |
|  | P3-73-8 | 9 | 53 | 37.40±3.82 | 12.07 | 0.32 | 1.60 |
|  | P3-73-10 | 7 | 32 | 22.67±7.88 | 13.65 | 0.60 | 1.75 |
|  | P3-89-2 | 0 | 38 | 18.50±3.56 | 11.25 | 0.61 | 1.74 |
|  | P3-89-4 | 0 | 11 | 5.00±1.53 | 3.74 | 0.75 | 1.00 |
|  | P3-89-7 | 4 | 14 | 12.00±2.00 | 2.83 | 0.24 | 5.75 |
|  | P3-89-9 | 0 | 16 | 6.50±3.95 | 7.90 | 1.21 | 1.12 |
|  | P3-89-10 | 0 | 52 | 14.30±4.98 | 15.76 | 1.10 | 1.37 |
|  | P4-4-3 | 0 | 4 | 2.17±0.60 | 1.47 | 0.68 | 4.04 |
|  | P4-4-4 | 0 | 12 | 3.30±1.36 | 4.30 | 1.30 | 1.11 |
|  | P4-4-6 | 1 | 25 | 8.90±2.14 | 6.76 | 0.76 | * |
|  | P4-4-10 | 2 | 13 | 7.89±1.40 | 4.43 | 0.56 | 1.38 |
|  | P4-9-1 | 0 | 10 | 5.89±1.07 | 3.37 | 0.57 | 1.50 |
|  | P4-9-2 | 0 | 12 | 7.50±1.69 | 4.14 | 0.55 | 1.64 |
|  | P4-9-3 | 6 | 27 | 16.00±2.18 | 6.88 | 0.43 | 1.75 |
|  | P4-9-4 | 11 | 20 | 15.57±1.21 | 3.21 | 0.21 | 1.38 |
|  | P4-9-5 | 5 | 37 | 23.00±3.05 | 9.65 | 0.42 | 1.12 |
|  | P4-9-6 | 18 | 34 | 25.20±1.76 | 5.57 | 0.22 | 1.64 |
|  | P4-9-7 | 14 | 30 | 21.78±1.49 | 4.71 | 0.22 | 2.10 |
|  | P4-9-8 | 4 | 20 | 10.50±3.40 | 6.81 | 0.65 | 1.83 |
|  | P4-9-9 | 11 | 22 | 16.40±1.56 | 4.95 | 0.30 | 6.72 |
|  | P4-9-10 | 1 | 11 | 6.00±2.89 | 5.00 | 0.83 | 1.61 |
|  | P4-12-1 | 18 | 32 | 22.40±1.42 | 4.48 | 0.20 | 5.84 |
|  | P4-12-2 | 15 | 30 | 23.90±1.59 | 5.04 | 0.21 | 1.42 |
|  | P4-12-3 | 22 | 36 | 27.44±1.46 | 4.61 | 0.17 | 1.68 |
|  | P4-12-4 | 20 | 40 | 27.50±2.40 | 7.60 | 0.28 | 1.48 |
|  | P4-12-5 | 9 | 37 | 22.00±3.21 | 10.15 | 0.46 | 1.55 |
|  | P4-12-6 | 31 | 51 | 39.80±3.25 | 7.26 | 0.18 | 1.92 |
|  | P4-12-7 | 17 | 31 | 23.30±1.47 | 4.64 | 0.20 | 4.13 |
|  | P4-12-8 | 24 | 39 | 30.10±1.58 | 5.00 | 0.17 | 1.32 |
|  | P4-12-9 | 14 | 29 | 22.20±1.87 | 5.90 | 0.27 | 1.59 |
|  | P4-12-10 | 34 | 47 | 39.40±2.34 | 5.22 | 0.13 | 1.43 |
|  | P4-15-1 | 2 | 29 | 16.50±2.97 | 9.41 | 0.57 | 3.95 |
|  | P4-15-2 | 0 | 20 | 10.00±2.19 | 6.91 | 0.69 | 1.84 |
|  | P4-15-3 | 11 | 31 | 17.70±2.03 | 6.41 | 0.36 | 1.67 |
|  | P4-15-4 | 2 | 27 | 14.80±2.63 | 8.32 | 0.56 | 1.30 |
|  | P4-15-5 | 14 | 51 | 26.10±3.66 | 11.59 | 0.44 | 1.46 |
|  | P4-15-6 | 23 | 44 | 32.20±2.24 | 7.08 | 0.22 | 1.60 |
|  | P4-15-7 | * | * | * | * | * | 1.14 |
|  | P4-15-8 | 0 | 1 | 0.67±0.33 | 0.58 | 0.87 | * |
|  | P4-15-9 | 5 | 10 | 7.33±1.45 | 2.52 | 0.34 | 0.12 |
|  | P4-22-1 | 0 | 31 | 6.83±4.92 | 12.06 | 1.76 | 1.02 |
|  | P4-22-2 | 0 | 34 | 18.40±2.82 | 8.91 | 0.48 | 1.24 |
|  | P4-22-3 | 10 | 23 | 15.10±1.51 | 4.77 | 0.32 | 1.54 |
|  | P4-22-4 | 5 | 31 | 19.60±2.61 | 8.25 | 0.42 | 1.13 |
|  | P4-22-5 | 13 | 35 | 23.30±2.25 | 7.12 | 0.31 | 1.33 |
|  | P4-22-6 | 9 | 33 | 21.20±2.47 | 7.81 | 0.37 | 1.35 |
|  | P4-22-7 | 11 | 34 | 24.60±2.12 | 6.72 | 0.27 | 1.18 |
|  | P4-22-8 | 14 | 33 | 24.70±1.90 | 6.00 | 0.24 | 1.47 |
|  | P4-22-9 | 6 | 21 | 13.20±1.65 | 5.22 | 0.40 | 1.53 |
|  | P4-22-10 | 6 | 8 | 7.00±1.00 | 1.41 | 0.20 | 1.42 |

Here, Min: Minimum, Max: Maximum, SE: Standard Error, Std. Dev.: Standard Deviation, CV: Coefficient of Variation, * means missing values

Supplementary **Table 4**. Mean performance of targeted traits of selected wheat genotypes at **F5 generation**

| Line Number and Checks | PH | ETPP | HGW | DH | GPS | SPS | DM | Chl. H | Chl. GF | CGF | YPP |
| --- | --- | --- | --- | --- | --- | --- | --- | --- | --- | --- | --- |
| P3-2-2 | 83.20 ab | 3.27 ab | 4.63 a-c | 65 a-d | 46.40 a-d | 17.11 ab | 107.67 c | 48.87 a-c | 19.84 a | 17.90 de | 6.80 a-c |
| P3-2-6 | 85.76 ab | 3.00 ab | 4.21 a-f | 66.33 a-c | 50.25 a-c | 16.69 ab | 107.67 c | 52.62 a | 13.91 a-e | 17.53 e | 6.18 a-d |
| P3-3-3 | 85.70 ab | 2.67 ab | 3.06 gh | 66.33 a-c | 54.19 a | 18.04 a | 113.67 a | 44.50 bc | 13.40 a-e | 23.26 a-e | 4.38 cd |
| P3-4-6 | 81.40 ab | 2.73 ab | 3.01 gh | 57 jk | 52.31 ab | 15.34 a-c | 107.33 c | 47.49 a-c | 10.48 c-e | 22.16 a-e | 4.20 cd |
| P3-5-2 | 83.97 ab | 3.20 ab | 3.56 d-h | 58 i-k | 45.92 a-d | 14.77 bc | 107 c | 44.30 bc | 8.79 e | 21.90 b-e | 4.96 b-d |
| P3-11-3 | 80.17 ab | 2.73 ab | 3.84 b-g | 60.33 f-i | 48.28 a-c | 15.60 a-c | 107.67 c | 50.45 ab | 17.22 a-c | 21.20 b-e | 5.10 b-d |
| P3-18-3 | 78.17 ab | 3.60 ab | 3.82 b-h | 60.67 e-i | 44.18 a-d | 16.45 ab | 107.33 c | 45.50 a-c | 8.80 e | 25.10 a-c | 5.85 a-d |
| P3-18-10 | 76.63 b | 2.27 b | 2.77 h | 59.67 g-j | 47.70 a-c | 15.99 ab | 110 b | 52.54 a | 19.0 ab | 21.43 b-e | 2.77 d |
| P3-21-10 | 86.83 a | 3.67 ab | 3.84 b-g | 62 d-h | 43.85 a-d | 15.07 a-c | 107.67 c | 47.16 a-c | 11.52 c-e | 26.76 ab | 5.75 a-d |
| P3-24-10 | 62.97 c | 3.73 ab | 3.43 e-h | 62 d-h | 47.47 a-c | 15.60 a-c | 113.67 a | 50.64 ab | 11.63 b-e | 18.76 de | 6.93 a-c |
| P3-28-3 | 76.93 b | 3.87 ab | 4.31 a-f | 59 h-j | 43.89 a-d | 16.49 ab | 113.00 a | 47.94 a-c | 13.82 a-e | 20.63 c-e | 8.91 a |
| P3-29-2 | 83.27 ab | 3.53 ab | 3.97 a-g | 59 h-j | 43.97 a-d | 16.29 ab | 113.33 a | 49.27 a-c | 14.75 a-e | 18.16 de | 6.23 a-c |
| P3-29-4 | 87.53 a | 4.07 a | 4.54 a-d | 67.00 a | 47.85 a-c | 16.59 ab | 113.67 a | 51.32 ab | 17.27 a-c | 17.86 de | 8.39 ab |
| P3-29-10 | 79.00 ab | 3.13 ab | 3.55 d-h | 63.33 c-f | 38.78 bcd | 15.75 a-c | 113.67 a | 46.59 a-c | 15.50 a-e | 24.93 a-c | 4.18 cd |
| P4-12-6 | 57.63 c | 3.20 ab | 3.63 c-h | 62.33 d-g | 46.87 a-d | 14.73 bc | 107.67 c | 47.86 a-c | 14.06 a-e | 24.96 a-c | 5.40 b-d |
| P4-12-10 | 59.20 c | 3.13 ab | 3.79 b-h | 62 d-h | 46.40 a-d | 14.80 bc | 107 c | 47.96 a-c | 9.38 de | 23.60 a-d | 5.38 b-d |
| Aghrani | 82.57 ab | 2.87 ab | 3.29 f-h | 59.67 g-j | 41.32 a-d | 15.53 a-c | 107.67 c | 42.04 c | 13.65 a-e | 26.93 ab | 3.95 cd |
| Shatabdi | 82.77 ab | 2.60 ab | 4.77 ab | 63 d-f | 36.01 cd | 14.70 bc | 107 c | 44.34 bc | 16.28 a-d | 27.93 a | 4.39 cd |
| BARI Gom 25 | 85.57 ab | 3.07 ab | 4.98 a | 55 k | 31.92 d | 12.72 c | 106.67 c | 44.40 bc | 13.84 a-e | 19.30 c-e | 4.90 cd |
| BWMRI Gom 1 | 82.17 ab | 2.80 ab | 3.03 gh | 63.67 b-e | 40.44 a-d | 15.85 ab | 106.67 c | 46.82 a-c | 14.02 a-e | 19.50 c-e | 3.59 cd |
| BWMRI Gom 2 | 86.06 ab | 3.00 ab | 3.04 gh | 66.67 ab | 42.85 a-d | 16.04 ab | 110 b | 50.13 ab | 13.17 a-e | 19.76 c-e | 3.96 cd |
| BWMRI Gom 3 | 84.25 ab | 2.87 ab | 4.39 a-e | 63 d-f | 40.98 a-d | 14.95 bc | 107 c | 49.42 a-c | 15.07 a-e | 26.63 ab | 4.99 b-d |
| LSD | 9.62 | 1.69 | 1.06 | 3.11 | 15.25 | 3.09 | 2.25 | 7.40 | 7.42 | 5.95 | 3.44 |
| Range | 57.63-87.53 | 2.27-4.07 | 2.77-4.98 | 55-67 | 31.92-54.19 | 12.72-18.04 | 106.67-113.67 | 42.04-52.62 | 8.79-19.84 | 17.53-27.93 | 2.77-8.91 |

Here, means with the same letter are not significantly different

PH=Plant Height, ETPP= Effective Tillers Per Plant, HGW= Hundred Grain Weight, DH= Days to Heading, GPS= Grains Per Spike, SPS= Spikelet Per Spike, DM= Days to Maturity, Chl. H= Chlorophyll at Heading, Chl. GF= Chlorophyll at Grain Filling, CGF= Canopy Temperature at Grain Filling, YPP= Yield Per Plant, LSD: Least Significant Difference

Supplementary **Table 6**. Mean performance of the **F6 generation of** wheat advanced lines under heat stress condition

| Entry Name | | DTH | DTA | GFD | DTM | GPS | GWPS | TGW | SPAD-1 | SPAD-2 | | CT | CTD | PH | SL | SPS | YPP |
| --- | --- | --- | --- | --- | --- | --- | --- | --- | --- | --- | --- | --- | --- | --- | --- | --- | --- |
| Advanced line1 | | 58 | 69 | 33 | 102 | 38 | 1.5 | 40.7 | 42.1 | 41.5 | | 30.0 | 2.9 | 89.9 | 12.3 | 18 | 356.5 |
| Advanced line2 | | 58 | 67 | 36 | 103 | 44 | 2.0 | 45.9 | 43.9 | 42.6 | | 29.0 | 3.8 | 91.1 | 12.7 | 18 | 383.1 |
| Advanced line3 | | 58 | 67 | 37 | 104 | 34 | 1.5 | 45.2 | 44.3 | 41.0 | | 30.2 | 2.7 | 85.2 | 11.9 | 18 | 345.2 |
| Advanced line4 | | 58 | 67 | 36 | 103 | 45 | 1.8 | 39.5 | 44.9 | 41.7 | | 29.8 | 3.0 | 93.2 | 12.8 | 19 | 359.2 |
| Advanced line5 | | 58 | 67 | 36 | 103 | 39 | 1.6 | 40.5 | 40.2 | 34.0 | | 30.4 | 2.4 | 90.3 | 12.7 | 20 | 337.1 |
| Advanced line6 | | 57 | 68 | 34 | 102 | 35 | 2.0 | 55.6 | 39.2 | 35.8 | | 30.3 | 2.5 | 93.5 | 11.3 | 18 | 340.0 |
| Advanced line7 | | 55 | 67 | 35 | 102 | 41 | 1.8 | 44.0 | 39.0 | 36.4 | | 28.4 | 4.4 | 86.6 | 11.2 | 17 | 412.3 |
| Advanced line8 | | 64 | 72 | 32 | 104 | 42 | 1.7 | 42.1 | 39.4 | 35.6 | | 28.6 | 4.3 | 87.2 | 11.4 | 18 | 403.3 |
| Advanced line9 | | 69 | 85 | 30 | 115 | 46 | 1.7 | 37.4 | 39.7 | 42.7 | | 31.7 | 1.2 | 85 | 13.2 | 21 | 224.5 |
| Advanced line10 | | 60 | 68 | 37 | 105 | 39 | 1.6 | 40.6 | 36.0 | 41.8 | | 30.5 | 2.4 | 90.5 | 12.1 | 18 | 334.7 |
| Advanced line11 | | 67 | 71 | 31 | 102 | 41 | 1.3 | 30.7 | 44.3 | 41.1 | | 31.8 | 1.0 | 81.7 | 11.9 | 19 | 204.2 |
| Advanced line12 | | 62 | 68 | 37 | 105 | 39 | 1.7 | 43.0 | 41.6 | 34.5 | | 31.4 | 1.4 | 78.8 | 10.4 | 16 | 305.0 |
| Advanced line13 | | 69 | 85 | 30 | 115 | 41 | 1.8 | 43.4 | 40.4 | 35.6 | | 30.0 | 2.8 | 93.3 | 10.1 | 20 | 350.9 |
| Advanced line14 | | 63 | 68 | 37 | 105 | 46 | 1.9 | 41.6 | 39.5 | 34.8 | | 31.2 | 1.6 | 92.3 | 9.6 | 20 | 318.0 |
| Advanced line15 | | 66 | 70 | 32 | 102 | 40 | 1.9 | 47.4 | 40.9 | 33.4 | | 30.6 | 2.2 | 93.8 | 9.6 | 19 | 332.4 |
| Advanced line16 | | 66 | 70 | 32 | 102 | 46 | 2.1 | 45.3 | 39.6 | 33.3 | | 30.1 | 2.7 | 90.5 | 9.8 | 19 | 349.2 |
| Advanced line17 | | 65 | 70 | 32 | 102 | 48 | 2.1 | 44.0 | 40.7 | 39.6 | | 28.6 | 4.3 | 82.4 | 10.0 | 21 | 399.6 |
| Advanced line18 | | 69 | 85 | 30 | 115 | 58 | 2.3 | 39.6 | 44.0 | 42.6 | | 26.8 | 6.1 | 90.2 | 11.2 | 24 | 463.2 |
| Advanced line19 | | 64 | 72 | 32 | 104 | 53 | 2.2 | 42.0 | 43.7 | 44.8 | | 28.0 | 4.9 | 84.7 | 11.3 | 22 | 428.0 |
| Advanced line20 | | 56 | 66 | 40 | 106 | 48 | 2.0 | 40.6 | 48.7 | 46.0 | | 24.7 | 8.1 | 86.9 | 11.0 | 18 | 554.1 |
| Advanced line21 | | 56 | 66 | 40 | 106 | 54 | 2.0 | 37.5 | 47.9 | 41.0 | | 24.1 | 8.7 | 85.3 | 10.6 | 19 | 612.4 |
| Advanced line22 | | 56 | 66 | 40 | 106 | 55 | 1.8 | 33.3 | 47.9 | 45.6 | | 25.6 | 7.2 | 84 | 10.7 | 18 | 509.5 |
| Advanced line23 | | 55 | 66 | 38 | 104 | 52 | 1.9 | 38.1 | 44.9 | 41.0 | | 26.4 | 6.5 | 77 | 9.6 | 15 | 470.2 |
| Advanced line24 | | 58 | 67 | 36 | 103 | 50 | 2.2 | 43.7 | 40.1 | 36.2 | | 28.5 | 4.4 | 93.3 | 11.9 | 21 | 408.3 |
| Advanced line25 | | 67 | 71 | 31 | 102 | 52 | 2.4 | 46.2 | 42.4 | 40.6 | | 26.9 | 5.9 | 100.9 | 12.2 | 22 | 460.9 |
| Advanced line26 | | 61 | 68 | 37 | 105 | 55 | 2.2 | 39.7 | 43.4 | 39.4 | | 26.1 | 6.8 | 86.4 | 11.6 | 22 | 475.1 |
| Advanced line27 | | 62 | 67 | 36 | 103 | 52 | 2.1 | 40.2 | 44.1 | 42.4 | | 27.0 | 5.8 | 83.7 | 11.6 | 23 | 460.4 |
| Advanced line28 | | 63 | 67 | 36 | 103 | 55 | 2.3 | 41.2 | 42.5 | 39.4 | | 28.2 | 4.6 | 82.5 | 11.2 | 21 | 418.1 |
| Advanced line29 | | 63 | 71 | 32 | 103 | 52 | 2.2 | 41.1 | 43.9 | 40.6 | | 27.3 | 5.5 | 82.1 | 11.7 | 22 | 443.7 |
| Advanced line30 | | 64 | 72 | 32 | 104 | 52 | 1.8 | 34.7 | 42.6 | 42.4 | 27.2 | | 5.6 | 82.8 | 12.2 | 22 | 455.2 |
| Advanced line31 | | 64 | 72 | 32 | 104 | 49 | 1.7 | 34.6 | 44.2 | 41.1 | 29.5 | | 3.3 | 85.6 | 11.1 | 22 | 373.2 |
| Advanced line32 | | 65 | 70 | 32 | 102 | 47 | 2.5 | 53.5 | 42.6 | 42.9 | 25.6 | | 7.2 | 94 | 11.1 | 21 | 506.9 |
| Advanced line33 | | 67 | 71 | 31 | 102 | 53 | 2.3 | 43.4 | 41.2 | 44.8 | 25.7 | | 7.2 | 101.6 | 12.2 | 22 | 497.9 |
| Advanced line34 | | 58 | 67 | 36 | 103 | 37 | 1.7 | 44.4 | 41.5 | 40.7 | 30.0 | | 2.9 | 90.9 | 11.0 | 21 | 350.7 |
| Advanced line35 | | 59 | 68 | 37 | 105 | 45 | 2.0 | 42.6 | 43.7 | 39.9 | 26.7 | | 6.2 | 93.4 | 10.9 | 20 | 468.4 |
| Advanced line36 | | 58 | 67 | 38 | 105 | 40 | 2.1 | 53.2 | 43.4 | 36.1 | 27.3 | | 5.6 | 96.1 | 10.9 | 20 | 450.2 |
| Advanced line37 | | 58 | 67 | 37 | 104 | 46 | 2.7 | 60.1 | 45.3 | 41.6 | 27.0 | | 5.8 | 93.6 | 11.1 | 21 | 459.1 |
| Advanced line38 | | 67 | 71 | 31 | 102 | 56 | 2.5 | 45.8 | 40.5 | 39.5 | 25.7 | | 7.1 | 98.8 | 11.9 | 22 | 493.5 |
| Advanced line39 | | 68 | 72 | 30 | 102 | 48 | 2.2 | 45.6 | 39.4 | 42.4 | 25.7 | | 7.2 | 101.5 | 11.8 | 23 | 492.0 |
| Advanced line40 | | 68 | 72 | 30 | 102 | 46 | 2.3 | 50.3 | 39.8 | 42.2 | 27.3 | | 5.6 | 92.1 | 12.2 | 22 | 447.2 |
| Advanced line41 | | 68 | 72 | 30 | 102 | 47 | 2.4 | 50.9 | 37.3 | 39.0 | 28.8 | | 4.0 | 93.9 | 11.5 | 22 | 395.7 |
| Advanced line42 | | 68 | 72 | 30 | 102 | 52 | 2.4 | 45.7 | 39.7 | 42.1 | 29.4 | | 3.5 | 96 | 11.9 | 23 | 375.6 |
| Advanced line43 | | 68 | 72 | 30 | 102 | 38 | 2.0 | 53.1 | 38.8 | 39.0 | 28.6 | | 4.3 | 91.5 | 11.3 | 22 | 400.9 |
| Advanced line44 | | 68 | 72 | 30 | 102 | 47 | 2.2 | 46.8 | 39.7 | 38.5 | 29.4 | | 3.4 | 95.8 | 11.0 | 22 | 375.0 |
| Advanced line45 | | 58 | 67 | 39 | 106 | 55 | 2.6 | 46.2 | 43.1 | 41.4 | 24.9 | | 7.9 | 99.9 | 12.7 | 22 | 547.4 |
| Advanced line46 | | 58 | 67 | 39 | 106 | 55 | 2.3 | 42.2 | 41.0 | 39.5 | 25.4 | | 7.4 | 98.7 | 12.4 | 23 | 522.4 |
| Advanced line47 | | 58 | 67 | 39 | 106 | 51 | 2.3 | 45.0 | 45.8 | 42.0 | 25.3 | | 7.5 | 96.6 | 12.8 | 22 | 534.5 |
| Advanced line48 | | 65 | 70 | 32 | 102 | 47 | 2.3 | 48.4 | 40.9 | 37.8 | 26.2 | | 6.6 | 95.9 | 12.1 | 22 | 471.1 |
| Advanced line49 | | 58 | 67 | 39 | 106 | 51 | 2.1 | 41.6 | 44.2 | 42.3 | 24.2 | | 8.6 | 93.3 | 11.6 | 21 | 603.8 |
| Advanced line50 | | 55 | 67 | 35 | 102 | 35 | 1.7 | 47.9 | 43.4 | 37.8 | 27.1 | | 5.8 | 85.6 | 9.8 | 18 | 458.9 |
| Advanced line51 | | 56 | 66 | 40 | 106 | 39 | 2.0 | 51.4 | 44.1 | 39.5 | 24.4 | | 8.5 | 94.5 | 11.1 | 21 | 580.9 |
| Advanced line52 | | 56 | 67 | 35 | 102 | 50 | 1.8 | 37.1 | 42.1 | 38.7 | 25.7 | | 7.2 | 88.9 | 10.6 | 21 | 492.2 |
| Advanced line53 | | 69 | 72 | 30 | 102 | 46 | 2.0 | 43.7 | 40.3 | 38.2 | 28.2 | | 4.6 | 85.9 | 11.3 | 21 | 417.6 |
| Advanced line54 | | 56 | 66 | 40 | 106 | 43 | 1.8 | 40.0 | 44.6 | 41.5 | 25.3 | | 7.5 | 94.6 | 11.5 | 21 | 534.8 |
| Advanced line55 | | 69 | 72 | 30 | 102 | 43 | 1.9 | 44.1 | 38.0 | 41.3 | 28.2 | | 4.7 | 88.3 | 11.0 | 22 | 418.1 |
| Advanced line56 | | 60 | 67 | 36 | 103 | 40 | 2.0 | 48.2 | 42.5 | 38.6 | 28.6 | | 4.3 | 87.7 | 11.2 | 23 | 404.7 |
| Advanced line57 | | 57 | 68 | 34 | 102 | 39 | 2.0 | 50.5 | 41.4 | 43.4 | 26.5 | | 6.3 | 91.4 | 10.8 | 20 | 469.5 |
| Advanced line58 | | 57 | 68 | 34 | 102 | 47 | 1.9 | 41.3 | 41.5 | 39.5 | 27.4 | | 5.5 | 92.4 | 11.1 | 21 | 441.9 |
| Advanced line59 | | 56 | 66 | 40 | 106 | 44 | 2.1 | 46.9 | 43.7 | 42.8 | 25.0 | | 7.8 | 94.8 | 11.7 | 22 | 535.2 |
| Advanced line60 | | 59 | 68 | 37 | 105 | 41 | 1.9 | 46.0 | 45.5 | 38.5 | 26.1 | | 6.7 | 94.1 | 10.5 | 20 | 475.7 |
| BARI Gom 30(Check) | | 56 | 67 | 37 | 104 | 36 | 1.7 | 47.5 | 41.3 | 32.1 | 28.6 | | 4.3 | 88.9 | 9.6 | 17 | 401.1 |
| BARI Gom 33(Check) | | 60 | 68 | 36 | 104 | 42 | 2.4 | 57.1 | 47.2 | 42.9 | 27.8 | | 5.0 | 98.8 | 13.3 | 19 | 432.1 |
| AGRHANI (Parent) | | 60 | 66 | 38 | 104 | 44 | 1.8 | 41.5 | 41.6 | 34.5 | 25.7 | | 7.1 | 93.5 | 11.1 | 20 | 494.2 |
| SHATABDI (Parent) | | 60 | 65 | 38 | 103 | 41 | 1.9 | 45.8 | 38.8 | 36.8 | 25.8 | | 7.0 | 97.4 | 10.6 | 20 | 489.8 |
| BARI Gom 25(Parent) | | 62 | 67 | 37 | 104 | 41 | 2.1 | 41.2 | 38.5 | 36.3 | 29.2 | | 3.7 | 96.1 | 11.3 | 21 | 377.1 |
| Grand Mean | | 61.5 | 69.3 | 34.7 | 104.0 | 46 | 2.0 | 44.1 | 42.1 | 39.7 | 27.7 | | 5.1 | 90.9 | 11.3 | 20 | 432.4 |
| Range | Max | 69.0 | 85.0 | 40.0 | 115.0 | 58 | 2.7 | 60.1 | 48.7 | 46.0 | 31.8 | | 8.7 | 101.6 | 13.3 | 24 | 612.4 |
| Min | 55.0 | 65.0 | 30.0 | 102.0 | 34 | 1.3 | 30.7 | 36.0 | 32.1 | 24.1 | | 1.0 | 77.0 | 9.6 | 15 | 204.2 |
| LSD0.05 | | 4.8 | 0.9 | 0.4 | 0.4 | 6.2 | 0.3 | 1.0 | 3.0 | 3.4 | 1.1 | | 1.1 | 4.9 | 0.6 | 1.3 | 38.7 |

Here, DTH= Days to heading, DTA= Days to anthesis, GFD= Grain filling duration, DTM= Days to maturity, GPS= Grains per spike, GWPS= Grain weight per spike, TGW= Thousand grain weight, SPAD-1= Chlorophyll content at anthesis, SPAD-2= Chlorophyll content at grain filling stage, CT= Canopy temperature, CTD= Canopy temperature depression, PH= Plant height, SL= Spike length, SPS= Spikelet per spike, YPP= Yield per plot
