# Supplementary material
Source: Research Square preprint supplement (doi:10.21203/rs.3.rs-9647180/v1)
Supplement: Supplementary file 2 [file 742e78c44a8342618728c489.docx]

Table 1.Name and sources of the experimental materials

| Sl. No. | Entry Name | Source |
| --- | --- | --- |
| 01 | HSTUW1 | Department of Genetics and Plant Breeding, HSTU, Dinajpur. |
| 02 | HSTUW2 |
| 03 | HSTUW3 |
| 04 | HSTUW4 |
| 05 | HSTUW5 |
| 06 | HSTUW6 |
| 07 | HSTUW7 |
| 08 | HSTUW8 |
| 09 | HSTUW9 |
| 10 | HSTUW10 |
| 11 | BARI Gom 32 | Bangladesh Wheat and Maize Research Institute (BWMRI), Dinajpur, Bangladesh |

Table 2.Doses and methods of application of fertilizers in a wheat field

| Manure and fertilizers/ Manure | Doses  (kg/432m2) | Method |
| --- | --- | --- |
| Cow dung | 150 | Basal application |
| Dolomite | 31 | Basal application |
| Urea | 7.90 | 3 split doses (1/3rd during FLP and rests are top dressed, 1/3rd at 21 DAS, and 1/3rd not applied yet) |
| Diammonium phosphate (DAP) | 3.11 | ½ During final land preparation, rest ½ at 21 DAS |
| Muriate of potash (MoP) | 5.48 | ½ During final land preparation, rest ½ at 21 DAS |
| Gypsum | 3.19 | ½ During final land preparation, rest ½ at 21 DAS |
| Zinc Sulphate | 0.20 | ½ During final land preparation, rest ½ at 21 DAS |
| Magnesium sulfate | 1.56 | ½ During final land preparation, rest ½ at 21 DAS |
| Boric acid | 0.31 | ½ During final land preparation, rest ½ at 21 DAS |

Table 3. Microsatellite/Simple Sequences Repeat (SSR) Markers

| Serial  Number | Primer name | Sequence | | Phenotype | Annealing Temp.(C) |
| --- | --- | --- | --- | --- | --- |
| 1 | TaBarc101 | Forward | GCTCCTCTCACGATCACGCAAAG | Canopy temperature | 62 |
| Reverse | GCGAGTCGATCACACTATGAGCCAATG |  |
| 2 | Xwmc112 | Forward | TGAGTTGTGGGGTCTTGTTTGG | Spike and yield | 58 |
| Reverse | TGAAGGAGGGCACATATCGTG |
| 3 | Barc20 | Forward | GCGATCCACACTTTGCCTCTTTTACA | Dwarfism | 59 |
| Reverse | GCGATGTCGGTTTTCAGCCTTTT |
| 4 | Gwm495 | Forward | GAGAGCCTCGCGAAATATAGG | Dwarfism | 56 |
| Reverse | TGCTTCTGGTGTTCCTTC G |

Table 4. Analysis of variance of morphological Traits

| Traits | Source of variation with the mean sum of square | | | Coefficient of Variation (%) |
| --- | --- | --- | --- | --- |
| Replication (df 2) | Genotypes (df 10) | Error (df 20) |
| Days to heading | 0.576 | 99.024 *** | 3.242 | 2.84 |
| Days to maturity | 0.091 | 76.691 *** | 1.091 | 0.94 |
| Plant height (cm) | 157.92 *** | 200.92 *** | 4.82 | 2.11 |
| Grain weight spike-1 (g) | 0.070 | 0.156 *** | 0.022 | 9.04 |
| 1000 grain weight (g) | 15.475 | 80.487 *** | 9.019 | 7.17 |
| Number of spikes | 4020.2 * | 8907.6 *** | 1014.5 | 7.73 |
| Spike length (cm) | 0.692 | 1.412 ** | 0.283 | 5.53 |
| Grain spike-1 | 4.485 | 62.971 *** | 6.641 | 6.43 |
| Yield plot-1 (kg) | 1195176 *** | 157678 *** | 25145 | 6.44 |

*, **, *** indicates significance at 5%, 1%, 0.1% level of probability respectively and NS= non-significant

Table 5. Mean performance of the selected morphological Traits

| Genotypes | DH | DM | GWPS (g) | PH (cm) | SL (cm) | GPS (g) | NOF 1 sq | TGW (g) | YPP |
| --- | --- | --- | --- | --- | --- | --- | --- | --- | --- |
| HSTUW 1 | 51.67e | 102.33d | 1.34c | 94.57ef | 8.58c | 34.13bc | 505.67a | 39.45a-c | 2.81a |
| HSTUW 2 | 55.67d-e | 105.67c | 1.32c | 92.35f | 9.10bc | 39.43ab | 477.00a-c | 33.09b-c | 2.08d |
| HSTUW 3 | 65.33a-b | 107.33c | 1.41bc | 94.08ef | 8.80c | 44.50a | 435.33a-d | 31.99 c | 2.12cd |
| HSTUW 4 | 69.33a | 113.00b | 1.75a-c | 116.33a | 9.90a-c | 39.57ab | 377.00d | 45.43a | 2.66ab |
| HSTUW 5 | 69.00a | 112.00b | 1.88a | 114.73ab | 10.73a | 45.03a | 359.00 d | 41.98a | 2.49a-d |
| HSTUW 6 | 68.33a | 111.67b | 1.85ab | 109.73bc | 9.84a-c | 41.63ab | 409.33b-d | 45.55a | 2.57a-c |
| HSTUW 7 | 68.00a | 113.00b | 1.84ab | 104.98cd | 9.85a-c | 43.57a | 351.67d | 43.38 a | 2.46a-d |
| HSTUW 8 | 62.00bc | 112.67b | 1.80ab | 105.50cd | 9.57a-c | 38.33a-c | 373.33d | 47.23a | 2.67ab |
| HSTUW 9 | 64.33a-c | 121.33a | 1.84ab | 107.17c | 10.58ab | 45.20a | 385.00 cd | 41.22a-b | 2.24b-d |
| HSTUW 10 | 65.00a-c | 113.00b | 1.74a-c | 107.55c | 9.71a-c | 38.57ab | 378.00d | 45.46a | 2.45a-d |
| BARI Gom 32 | 60.00cd | 107.00c | 1.42bc | 99.40de | 9.05bc | 30.93c | 483.33ab | 46.01a | 2.49a-d |
| Range | 51.67 – 69.33 | 102.33– 121.33 | 1.32 – 1.88 | 92.35- 116.33 | 8.58 – 10.73 | 30.93 – 45.20 | 351.67 - 505.67 | 31.99 - 47.23 | 2.08 – 2.81 |
| Mean | 63.52 | 110.82 | 1.65 | 104.22 | 9.61 | 40.08 | 412.24 | 41.89 | 2.46 |
| SE (±) | ±1.04 | ±0.60 | ±0.09 | ±1.27 | ±0.31 | ±1.49 | ±18.39 | ±1.73 | ±91.55 |
| HSD | 5.31 | 3.08 | 0.44 | 6.47 | 1.57 | 7.60 | 93.94 | 8.86 | 467.68 |

Here, DH= Days to heading, DM= Days to maturity, PH= Plant height (cm), GWPS= Grain weight spike-1 (g), TGW = 1000 grain weight (g), NOS= Number of spikes, SL= Spike length (cm), GPS= Grains per spike, YPP= Yield plot-1 (kg), SE= Standard error, HSD= Honestly significant difference.

Table 6. Genotypic Correlation coefficients among traits

| Traits | DH | DM | PH | GWPS | TGW | NOS | SL | GPS | YPP |
| --- | --- | --- | --- | --- | --- | --- | --- | --- | --- |
| DTH |  | 0.6692 * | 0.8002 ** | 0.9034 ** | 0.4273 NS | -0.8947 ** | 0.787 ** | 0.6858 * | -0.0393 NS |
| DTM |  |  | 0.6996 * | 0.9039 ** | 0.4478 NS | -0.8599 ** | 0.9879 ** | 0.6175 * | -0.1188 NS |
| PH |  |  |  | 0.9616 ** | 0.7478 ** | -0.8554 ** | 0.9122 ** | 0.3686 NS | 0.4214 NS |
| GWPS |  |  |  |  | 0.6154 * | -0.9873 ** | 1.0858 ** | 0.5491 NS | 0.3554 NS |
| TGW |  |  |  |  |  | -0.5039 NS | 0.5549 NS | -0.3247 NS | 0.8292 ** |
| NOS |  |  |  |  |  |  | -0.9151 ** | -0.6576 * | -0.1795 NS |
| SL |  |  |  |  |  |  |  | 0.6729 * | -0.0584 NS |
| GPS |  |  |  |  |  |  |  |  | -0.4879 NS |

Here *, ** significant at 5% and 1% level of probability respectively, and NS= non-significant respectively, DH= Days to heading, DM= Days to maturity, PH= Plant height (cm), GWPS= Grain weight spike-1 (g), TGW = 1000 grain weight (g), NOS= Number of spikes, SL= Spike length (cm), GPS= Grains per spike, YPP= Yield plot-1 (kg), SE= Standard error, HSD= Honestly significant difference.

Table 7. Genotypic (upper diagonal) and Phenotypic (lower diagonal) correlation coefficients among morphological traits

| Traits | DH | DM | PH | GWPS | TGW | NOS | SL | GPS | YPP |
| --- | --- | --- | --- | --- | --- | --- | --- | --- | --- |
| DH | **-** | 0.6692 * | 0.8002 ** | 0.9034 ** | 0.4273 NS | -0.8947 ** | 0.787 ** | 0.6858 * | -0.0393 NS |
| DM | 0.6274 ** | **-** | 0.6996 * | 0.9039 ** | 0.4478 NS | -0.8599 ** | 0.9879 ** | 0.6175 * | -0.1188 NS |
| PH | 0.7602 ** | 0.6517 ** | **-** | 0.9616 ** | 0.7478 ** | -0.8554 ** | 0.9122 ** | 0.3686 NS | 0.4214 NS |
| GWPS | 0.6173 ** | 0.7226 ** | 0.7412 ** | **-** | 0.6154 * | -0.9873 ** | 1.0858 ** | 0.5491 NS | 0.3554 NS |
| TGW | 0.2559 NS | 0.372 * | 0.5852 ** | 0.6483 ** | **-** | -0.5039 NS | 0.5549 NS | -0.3247 NS | 0.8292 ** |
| NOS | -0.7468 ** | -0.6876 ** | -0.6972 ** | -0.8256 ** | -0.3769 * | **-** | -0.9151 ** | -0.6576 * | -0.1795 NS |
| SL | 0.5981 ** | 0.6544 ** | 0.7386 ** | 0.6246 ** | 0.2212 NS | -0.6702 ** | **-** | 0.6729 * | -0.0584 NS |
| GPS | 0.5587 ** | 0.5191 ** | 0.3066 NS | 0.5554 ** | -0.2508 NS | -0.6428 ** | 0.557 ** | **-** | -0.4879 NS |
| YPP | -0.0416 NS | -0.1123 NS | 0.3459 * | 0.0935 NS | 0.5199 ** | 0.0868 NS | 0.0471 NS | -0.4269 * | **-** |

Here, *, ** significant at 5% and 1% level of probability respectively, and NS= non-significant respectively, DH= Days to heading, DM= Days to maturity, PH= Plant height (cm), GWPS= Grain weight spike-1 (g), TGW = 1000 grain weight (g), NOS= Number of spikes, SL= Spike length (cm), GPS= Grains per spike, YPP= Yield plot-1 (kg), SE= Standard error, HSD= Honestly significant difference.

Table 8. Direct (Diagonal) and indirect effect of genotypic path coefficients analysis among the morphological traits

| Traits | DH | DM | PH | GWPS | TGW | NOS | SL | GPS | YPP |
| --- | --- | --- | --- | --- | --- | --- | --- | --- | --- |
| DH | -0.234 | -1.241 | -0.534 | 3.228 | -1.395 | 2.196 | 0.943 | -3.003 | -0.039 NS |
| DM | -0.157 | -1.854 | -0.467 | 3.230 | -1.461 | 2.110 | 1.184 | -2.704 | -0.119 NS |
| PH | -0.187 | -1.297 | -0.668 | 3.436 | -2.441 | 2.099 | 1.093 | -1.614 | 0.421 NS |
| GWPS | -0.212 | -1.676 | -0.642 | 3.573 | -2.008 | 2.423 | 1.301 | -2.404 | 0.355 NS |
| TGW | -0.100 | -0.830 | -0.499 | 2.200 | -3.264 | 1.237 | 0.665 | 1.422 | 0.829 ** |
| NOS | 0.209 | 1.594 | 0.571 | -3.528 | 1.645 | -2.454 | -1.096 | 2.879 | -0.179 NS |
| SL | -0.184 | -1.831 | -0.609 | 3.880 | -1.811 | 2.246 | 1.198 | -2.946 | -0.058 NS |
| GPS | -0.160 | -1.145 | -0.246 | 1.962 | 1.060 | 1.614 | 0.806 | -4.379 | -0.488 NS |

Here, DH= Days to heading, DM= Days to maturity, PH= Plant height (cm), GWPS= Grain weight spike-1 (g), TGW = 1000 grain weight (g), NOS= Number of spikes, SL= Spike length (cm), GPS= Grains per spike, YPP= Yield plot-1 (kg), SE= Standard error, HSD= Honestly significant difference.

Table 9. Direct (Diagonal) and indirect effect of Phenotypic path coefficients analysis among the morphological traits

| Traits | DH | DM | PH | GWPS | TGW | NOS | SL | GPS | YPP |
| --- | --- | --- | --- | --- | --- | --- | --- | --- | --- |
| DH | -0.409 | -0.215 | 0.706 | -0.620 | 0.284 | -0.142 | -0.021 | 0.376 | -0.042 NS |
| DM | -0.256 | -0.343 | 0.605 | -0.726 | 0.412 | -0.131 | -0.023 | 0.349 | -0.112 NS |
| PH | -0.311 | -0.224 | 0.929 | -0.745 | 0.648 | -0.132 | -0.026 | 0.206 | 0.346 * |
| GWPS | -0.252 | -0.248 | 0.689 | -1.008 | 0.718 | -0.157 | -0.022 | 0.374 | 0.093 NS |
| TGW | -0.104 | -0.128 | 0.544 | -0.651 | 1.108 | -0.072 | -0.008 | -0.169 | 0.520 ** |
| NOS | 0.305 | 0.236 | -0.648 | 0.830 | -0.418 | 0.190 | 0.024 | -0.433 | 0.087 NS |
| SL | -0.244 | -0.225 | 0.686 | -0.628 | 0.245 | -0.127 | -0.035 | 0.375 | 0.047 NS |
| GPS | -0.228 | -0.178 | 0.285 | -0.558 | -0.278 | -0.122 | -0.020 | 0.673 | -0.427 * |

DH= Days to heading, DM= Days to maturity, PH= Plant height (cm), GWPS= Grain weight spike-1 (g), TGW = 1000 grain weight (g), NOS= Number of spikes, SL= Spike length (cm), GPS= Grains per spike, YPP= Yield plot-1 (kg), SE= Standard error, HSD= Honestly significant difference.

Table 10. Genetic study of the morphological traits

| Traits | Genotype Variance (σ2g) | Phenotype Variance (σ2p) | GCV (%) | PCV (%) | Heritability (%) | GA | GAM (%) |
| --- | --- | --- | --- | --- | --- | --- | --- |
| DH | 31.93 | 35.17 | 8.90 | 9.33 | 90.78 | 11.09 | 17.46 |
| DM | 25.20 | 26.29 | 4.53 | 4.63 | 95.85 | 10.12 | 9.14 |
| PH | 65.36 | 70.18 | 7.76 | 8.04 | 93.13 | 16.07 | 15.42 |
| GWPS | 0.04 | 0.07 | 12.73 | 15.62 | 66.47 | 0.35 | 21.38 |
| TGW | 23.82 | 32.84 | 11.65 | 13.68 | 72.54 | 8.56 | 20.44 |
| NOS | 2631.04 | 3645.52 | 12.44 | 14.65 | 72.17 | 89.77 | 21.77 |
| SL | 0.38 | 0.66 | 6.38 | 8.45 | 57.10 | 0.95 | 9.94 |
| GPS | 18.78 | 25.42 | 10.81 | 12.58 | 73.87 | 7.67 | 19.14 |
| YPP | 44177.68 | 69323.02 | 8.54 | 10.69 | 63.73 | 3345.65 | 14.04 |

Here, DH= Days to heading, DM= Days to maturity, PH= Plant height (cm), GWPS= Grain weight spike-1 (g), TGW = 1000 grain weight (g), NOS= Number of spikes, SL= Spike length (cm), GPS= Grains per spike, YPP= Yield plot-1 (kg), SE= Standard error, HSD= Honestly significant difference.

## Table 11. Number of alleles, allele range, and PIC values of 4 polymorphic markers

| SSR marker | Number of alleles | Range of allele size (bp) | PIC |
| --- | --- | --- | --- |
| TaBarc-101 | 6 | 120-185 | 0.82 |
| Xwmc-112 | 9 | 210-390 | 0.82 |
| Barc-20 | 7 | 195-390 | 0.84 |
| Gwm-495 | 9 | 160-300 | 0.87 |
| Average | 7.75 |  | 0.84 |

| Cluster | Size | Control | |
| --- | --- | --- | --- |
| Genotypes | |
| I | 3 | HSTUW 1, HSTUW 2, and HSTUW 3 | |
| II | 8 | Sub group I | HSTUW 4, HSTUW 5, HSTUW 6, and BARI Gom 32 |
| Sub group II | HSTUW 7, HSTUW 8, HSTUW 9, and HSTUW 10 |

## Table 12. Clustering of studied wheat genotypes
